# Supplementary material for: Prekinamycin and an isosteric-isoelectronic analogue exhibit comparable cytotoxicity towards K562 human leukemia cells
Source: Royal Society of Chemistry journal article supplement (doi:10.1039/c4md00197d), 2014-01-01
Supplement: c4md00197d1.pdf [file c4md00197d1.pdf]

## Prekinamycin and an Isosteric-Isoelectronic Analogue Exhibit Comparable Cytotoxicity Towards K562 Human Leukemia Cells

Glenn L. Abbott,<sup>a</sup> Xing Wu,<sup>b</sup> Zhufeng Zhao,<sup>c</sup> Lei Guo,<sup>c</sup> Vladimir B. Birman,<sup>c</sup> Brian B. Hasinoff<sup>b</sup>  
and Gary I. Dmitrienko\*<sup>a</sup>

\* *corresponding author*

<sup>a</sup> *Department of Chemistry, 200 University Ave. West, Waterloo, Canada, N2L 3G1. Fax: 1-519-746-0435; Tel: 1-519-888-4567 ext. 84642; E-mail: dmitrien@scimail.uwaterloo.ca*

<sup>b</sup> *Faculty of Pharmacy, Apotex Centre, University of Manitoba, 750 McDermot Ave., Winnipeg, Canada, R3E 0T5. Fax: 1-204-474-7617; Tel: 1-204-474-8325; E-mail: B\_Hasinoff@Umanitoba.ca*

<sup>c</sup> *Department of Chemistry, Washington University, 750 Campus Box 1134, One Brookings Drive, St Louis, U.S.A., 63130. E-mail: birman@wustl.edu*

### Supplementary Information

#### Contents:

|                                                             |            |
|-------------------------------------------------------------|------------|
| <b>1. Computational method.....</b>                         | <b>S2</b>  |
| <b>2. Cell culture and growth inhibition assays.....</b>    | <b>S2</b>  |
| <b>3. General procedures.</b>                               |            |
| <b>Material and Methods.....</b>                            | <b>S3</b>  |
| <b>Characterization Methods.....</b>                        | <b>S3</b>  |
| <b>4. Experimental procedures.....</b>                      | <b>S4</b>  |
| <b>5. <sup>1</sup>H and <sup>13</sup>C NMR spectra.....</b> | <b>S11</b> |
| <b>6. References.....</b>                                   | <b>S41</b> |

## 1. Theoretical calculations

All computations were performed at the DFT level of theory employing the hybrid density functional B3LYP<sup>1, 2</sup> (Becke three-parameter Lee-Yang-Parr exchange-correlation functional) and the 6-31G(d) basis set<sup>3</sup> (a valence double-zeta polarized basis set) using the suite of programs accessible in the commercially available software package Gaussian 03 by Gaussian Inc. (Copyright © 1994-2003, Gaussian, Inc)<sup>4</sup> installed on a desktop computer running the Linux operating system (Redhat Enterprise Linux 4). Unless otherwise stated, all calculations were carried out in the gas phase at  $T = 298.15$  K and  $P = 1$  atm.

## 2. Cell culture and growth inhibition assays

Human leukemia K562 cells, obtained from the American Type Culture Collection, were maintained as suspension cultures in Dulbecco's modified Eagle's medium (Invitrogen, Burlington, Canada) containing 4 mM L-glutamine and supplemented with 20 mM Hepes, 10% fetal calf serum (Invitrogen), 100 units/ml penicillin G, and 100 µg/ml streptomycin in an atmosphere of 5% CO<sub>2</sub> and 95% air at 37 °C (pH 7.4).

For the measurement of growth inhibition, K562 cells in exponential growth were harvested and seeded at 6000 cells/well in 96-well plates (100 µl/well). At 24 h later cells were treated with vehicle or various concentrations of kinamycin F and allowed to grow an additional 72 h. Kinamycin F was dissolved in DMSO and the final concentration of DMSO did not exceed 0.5% (v/v), which was an amount that was shown not to affect cytotoxicity. After treatment cells were assayed with the MTS CellTiter 96 Aqueous One Solution Cell Proliferation assay (Promega, Madison, WI). The spectrophotometric 96-well plate cell growth inhibition assay measures the ability of the cells to enzymatically reduce MTS. Three replicates were measured at each drug concentration and the IC<sub>50</sub>-values for growth inhibition were measured by fitting the absorbance–drug concentration data to a three-or four-parameter logistic equation as described.<sup>5</sup> The IC<sub>50</sub> data reported are the results of three such experiments carried out on three separate days.

### 3. General procedures

**Materials and Methods.** All reactions were carried out under an atmosphere of nitrogen and/or argon in flame-dried and/or oven-dried glassware with magnetic stirring unless otherwise stated. Where required, the purification of solvents and reagents was accomplished according to standard procedures.<sup>6</sup> All solvents were reagent grade unless otherwise stated. Dichloromethane and triethylamine were distilled from calcium hydride. DMSO was distilled from calcium hydride under reduced pressure. Toluene was distilled from sodium benzophenone ketyl. Dimethylformamide was pre-dried with calcium hydride and distilled under reduced pressure from 3Å molecular sieves and stored over 3Å molecular sieves. Alternatively, solvents were purified using the M. Braun Solvent Purification System.

All commercial reagents used were purchased from the Aldrich Chemical Co. or VWR Canada (EMD, BDH, Alfa Aesar and J.T. Baker) and were used as received unless otherwise stated. Reactions were monitored by analytical thin layer chromatography (TLC) with silica coated aluminum sheets (EMD TLC Silica gel 60 F<sub>254</sub>). Visualization was accomplished using UV light (254 nm) or basic KMnO<sub>4</sub> stain. Unless otherwise stated, purification of crude reaction products was carried out using flash silica gel chromatography (Silicycle SiliaFlash<sup>®</sup> P60 40-63 µm, 230-400 mesh) according to established procedures.<sup>7</sup> All reported yields refer to chromatographically and spectroscopically pure compounds unless otherwise stated.

**Characterization Methods.** In some instances, compounds previously reported in the literature in which the characterization data was insufficient are reported here with a more complete characterization data set. Melting points were obtained on a MEL-TEMP<sup>®</sup> apparatus (Laboratory Devices Inc., Holliston MA, USA) and are uncorrected. <sup>1</sup>H NMR spectra were acquired on a Bruker AC300 (300 MHz), Bruker AVANCE300 (300 MHz) or Bruker AVANCE500 (500 MHz) spectrometer and are reported in parts per million (ppm) in either CD<sub>2</sub>Cl<sub>2</sub> or CDCl<sub>3</sub> using the solvent residual peak as the internal standard. For CDCl<sub>3</sub> this was 7.24 and 77.0 ppm for <sup>1</sup>H NMR and <sup>13</sup>C NMR, respectively. Data are reported as chemical shift in ppm, integrated intensity; peak multiplicities; coupling constants *J* (Hz) and assignment. The following abbreviations are used for reporting peak multiplicities: br = broad, w = weak, s = singlet, d = doublet, t = triplet, q = quartet, dd = doublet of doublets, dt = doublet of triplets, m = multiplet. <sup>13</sup>C NMR spectra were broadband decoupled and acquired on Bruker AC300 (75.5 MHz), Bruker AVANCE300 (75.5 MHz) or Bruker AVANCE500 (125.8 MHz) spectrometers and are reported in ppm in CD<sub>2</sub>Cl<sub>2</sub> or CDCl<sub>3</sub>, using the carbon signal of the deuterated solvent as the internal standard. Infrared spectra (IR) were recorded on a Perkin Elmer Spectrum RX I FT-IR System spectrometer either as thin films on a NaCl plate, or as a KBr pellet or as a solution in CDCl<sub>3</sub> using an IR solution cell with 0.1 mm path length and CaF<sub>2</sub> windows. Low and high resolution mass spectra were recorded in electron impact (EI) mode, chemical ionization (CI) mode and/or electrospray ionization (ESI) mode obtained at the WATSPEC mass spectrometry facilities, University of Waterloo, Waterloo, Ontario, Canada.

## 4. Experimental procedures

**1,5-Dimethoxynaphthalene.** From a modification of a known procedure,<sup>8</sup> a solution of 1,5-dihydroxynaphthalene (**14**) (10.155 g, 0.0596 mol) was dissolved in acetone (850 mL) by vigorous stirring to which was added anhydrous K<sub>2</sub>CO<sub>3</sub> (101.186 g, 0.732 mol) followed by dimethyl sulfate (84 mL, 0.888 mol). The mixture was heated at reflux (60 °C oil bath) for 22 h. The solution was cooled to room temperature and filtered through a sintered glass funnel. Triethylamine (50 mL) was added to the filtrate and the mixture was evaporated to dryness on a rotary evaporator. The residue was taken up in dichloromethane (400 mL) and triethylamine (100 mL) and the mixture was stirred at room temperature for 15 min. This solution was then washed twice with 1 M HCl, once with brine, dried over Na<sub>2</sub>SO<sub>4</sub>, filtered and the solvent evaporated in vacuo to afford 11.07 g (99%) of the title compound as a brown solid. The crude naphthalene was typically taken to the next step without further purification: mp 174-176 °C (lit. value<sup>9</sup> 180-181 °C); IR (KBr, cm<sup>-1</sup>)  $\nu_{\max}$  3073, 3007, 2960, 2936, 2830, 1592, 1509, 1469, 1453, 1401, 1342, 1267, 1083, 865, 775; <sup>1</sup>H NMR (300 MHz, CDCl<sub>3</sub>)  $\delta$  7.83 (2H, d, *J* = 8.3 Hz, ArH), 7.37 (2H, dd, *J* = 7.9, 8.3 Hz, ArH), 6.84 (2H, d, *J* = 7.9 Hz, ArH), 3.98 (6H, s, ArOCH<sub>3</sub>); <sup>13</sup>C NMR (75.5 Hz, CDCl<sub>3</sub>)  $\delta$  155.2, 126.6, 125.1, 114.2, 104.5, 55.5; MS *m/z* (rel. intensity) (EI) 188 (M<sup>+</sup>, 100), 173 (57), 158 (3), 143 (7), 127 (4), 115 (38), 102 (8), 94 (3); HRMS (EI) calc. for C<sub>12</sub>H<sub>12</sub>O<sub>2</sub>: 188.0837, found: 188.0836.

**4,8-Dimethoxy-1-naphthaldehyde.** Following a known procedure,<sup>10</sup> 1,5-dimethoxynaphthalene (18.77 g, 0.0997 mol), toluene (20 mL) and DMF (12 mL, 0.155 mol) were mixed together and cooled to 0 °C. To this was added POCl<sub>3</sub> (12 mL, 0.129 mol) and stirring was continued for another hour. The mixture was then heated at 110 °C for two hours, cooled to room temperature and poured into 300 mL of 10% NaOH containing 100 mL ice. The mixture was then extracted with benzene three times. The extracts were pooled, washed twice with 1 M HCl, twice with water, once with brine, dried over Na<sub>2</sub>SO<sub>4</sub>, filtered and concentrated in vacuo to furnish 19.73 g (92%) of the title compound as a light orange solid that was of satisfactory purity for the next step. A small amount (0.1462 g) was purified by column chromatography (silica, 1:1 hexanes:ether) and recrystallized from ethanol to furnish fine white needles: mp 127-128 °C (lit. value<sup>10</sup> 125-126 °C); IR (KBr, cm<sup>-1</sup>)  $\nu_{\max}$  3073, 3025, 2971, 2908, 2838, 1663, 1587, 1517, 1465, 1412, 1330, 1270, 1225, 1064, 868, 828, 801, 765; <sup>1</sup>H NMR (300 MHz, CDCl<sub>3</sub>)  $\delta$  11.03 (1H, s, CHO), 8.05 (1H, d, *J* = 8.3 Hz, ArH), 7.93 (1H, dd, *J* = 0.7, 8.3 Hz, ArH), 7.42 (1H, dd, *J* = 7.9, 8.3 Hz, ArH), 7.01 (1H, d, *J* = 7.9 Hz, ArH), 6.87 (1H, d, *J* = 8.3 Hz, ArH), 4.03 (3H, s, OCH<sub>3</sub>), 3.99 (3H, s, OCH<sub>3</sub>); <sup>13</sup>C NMR (75.5 Hz, CDCl<sub>3</sub>)  $\delta$  194.6, 159.5, 156.4, 129.3, 127.7, 127.1, 125.8, 124.7, 115.3, 107.8, 103.9, 55.9, 55.6; MS *m/z* (rel. intensity) (EI) 216 (M<sup>+</sup>, 100), 215 (30), 201 (19), 185 (17), 173 (10), 143 (3), 115 (17), 102 (5); HRMS (EI) calc. for C<sub>13</sub>H<sub>12</sub>O<sub>3</sub>: 216.0786, found: 216.0783.

**4,8-Dimethoxynaphthalen-1-yl formate (15).** Following a published procedure,<sup>10</sup> to a solution of naphthaldehyde (19.61 g, 0.0906 mol) in dichloromethane (900 mL) was added *m*CPBA (39.305 g at 75.7% assay, 0.172 mol). The solution was stirred vigorously at room temperature for 2 h 40 min. This solution was then poured into 10% Na<sub>2</sub>S<sub>2</sub>O<sub>3</sub> (700 mL) and stirred for 25 min. The aqueous layer was removed and water (900 mL) was added. The mixture was stirred

for 5 min and the aqueous layer removed. This sequence was repeated once more. The solution was then transferred to a separatory funnel and washed with a 10% solution of Na<sub>2</sub>S<sub>2</sub>O<sub>3</sub> twice with water washings between and three washings with saturated NaHCO<sub>3</sub> solution with water washings between, brine once, dried over Na<sub>2</sub>SO<sub>4</sub>, filtered and the solvent evaporated in vacuo producing 19.44 g (92%) of the crude formate as a brown solid. The crude material was employed in the next step without further purification. A small portion (0.587 g) was purified by column chromatography (silica, 2:1 hexanes:ether) to afford 0.224 g of the title compound as fine colourless needles: mp 136 °C (lit. value<sup>11</sup> 137-138.5 °C); IR (NaCl, film, cm<sup>-1</sup>)  $\nu_{\max}$  2938, 1737, 1599, 1516, 1449, 1411, 1378, 1267, 1148, 1125, 1061, 846, 789, 746; <sup>1</sup>H NMR (300 MHz, CDCl<sub>3</sub>)  $\delta$  8.32 (1H, s, CHO), 7.88 (1H, dd, *J* = 0.7, 8.3 Hz, ArH), 7.39 (1H, dd, *J* = 8.0, 8.3 Hz, ArH), 7.03 (1H, d, *J* = 8.3 Hz, ArH), 6.89 (1H, d, *J* = 8.0 Hz, ArH), 6.75 (1H, d, *J* = 8.3 Hz, ArH), 3.97 (3H, s, ArOCH<sub>3</sub>), 3.89 (3H, s, ArOCH<sub>3</sub>); <sup>13</sup>C NMR (75.5 MHz, CDCl<sub>3</sub>)  $\delta$  160.9, 154.9, 153.7, 138.9, 128.3, 126.2, 119.2, 118.8, 115.0, 107.1, 103.7, 55.82, 55.78; MS *m/z* (rel. intensity) (EI) 232 (M<sup>+</sup>, 32), 204 (54), 189 (100), 174 (18), 161 (5), 146 (3), 118 (3), 102 (6); HRMS (EI) calc. for C<sub>13</sub>H<sub>12</sub>O<sub>4</sub>: 232.0736, found: 232.0739.

**4,8-Dimethoxynaphthalen-1-ol.** Following a known procedure,<sup>10</sup> the crude formate **15** (24.39 g, 0.105 mol) obtained from the previous reaction was dissolved in a 1:1 mixture of degassed methanol/THF (750 mL) and stirred on ice at 0 °C. Potassium hydroxide (17.186 g, 0.3063 mol) was dissolved in methanol (150 ml), extensively degassed, cooled to 0 °C and added to the formate solution that was then stirred for 1 h. The reaction was quenched with 5% aq. HCl (130 mL) to obtain a pH ~2, poured into water (3 L) and extracted three times with dichloromethane. The organic extracts were pooled, washed twice with water and dried over sodium sulfate, filtered through a sintered funnel and the solvent evaporated in vacuo to yield 20.60 g of a dark brown solid. The crude naphthenol was purified by flash column chromatography (silica, CHCl<sub>3</sub>) furnishing 13.646 g (64%) of the title compound as a pale yellow solid: mp 153-154 °C (lit. value<sup>10</sup> 155-156 °C); IR (NaCl, film, cm<sup>-1</sup>)  $\nu_{\max}$  3419, 2942, 1631, 1514, 1446, 1412, 1288, 1071, 815, 752; <sup>1</sup>H NMR (300 MHz, CDCl<sub>3</sub>)  $\delta$  8.92 (1H, s, ArOH), 7.84 (1H, dd, *J* = 0.8, 8.3 Hz, ArH), 7.32 (1H, dd, *J* = 7.9, 8.3 Hz, ArH), 6.82 (1H, d, *J* = 7.9 Hz, ArH), 6.77, 6.75 (2H, AB<sub>q</sub>, *J* = 8.5 Hz, H<sub>2</sub>, H<sub>3</sub>), 4.03 (3H, s, ArOCH<sub>3</sub>), 3.92 (3H, s, ArOCH<sub>3</sub>); <sup>13</sup>C NMR (75.5 MHz, CDCl<sub>3</sub>)  $\delta$  155.9, 148.1, 147.9, 127.8, 125.1, 115.9, 115.5, 109.0, 106.3, 104.9, 56.1, 55.9; MS *m/z* (rel. intensity) (EI) 204 (M<sup>+</sup>, 82), 189 (100), 174 (19), 161 (5), 146 (3), 131 (2), 118 (4), 102 (5); HRMS (EI) calc. for C<sub>12</sub>H<sub>12</sub>O<sub>3</sub>: 204.0786, found: 204.0780.

**2-Bromo-4,8-dimethoxynaphthalen-1-ol.** Following a published procedure,<sup>10</sup> the naphthenol (12.157 g, 0.0595 mol) obtained from the previous reaction was dissolved in CCl<sub>4</sub> (600 mL) and was stirred vigorously at room temperature. A separate flask was charged with bromine (9.746 g, 0.0609 mol) dissolved in CCl<sub>4</sub> (100 mL) which was immediately transferred to a dropping funnel. The flask was rinsed with two separate washings of CCl<sub>4</sub> (25 mL each) and these rinses were added to the dropping funnel to ensure quantitative transfer of bromine. The bromine solution was then added drop-wise to the stirred solution of naphthenol over the course of 2 h, after which stirring continued for another hour at which time a 20% solution of Na<sub>2</sub>S<sub>2</sub>O<sub>3</sub> (800 mL) was added and stirred for 10 min. This solution was transferred to a separatory funnel and the aqueous and organic layers separated. The aqueous layer was extracted three times with

CH<sub>2</sub>Cl<sub>2</sub> and the extracts were pooled, washed twice with a 10% solution of Na<sub>2</sub>S<sub>2</sub>O<sub>3</sub>, once with water, once with brine and dried over Na<sub>2</sub>SO<sub>4</sub>, filtered and concentrated under reduced pressure. The same workup procedure was also applied to the CCl<sub>4</sub> layer. The crude products were pooled together to give 16.728 g (99%) of the title compound as a brown solid which was judged by <sup>1</sup>H NMR to be sufficiently pure for the following step. A small portion (0.1814 g) was purified by column chromatography (silica, 2:1 hexanes:ether) to afford 0.1519 g of a white solid as fine needles: mp 138-139 °C (lit. value<sup>10</sup> 141-142 °C); IR (NaCl, film, cm<sup>-1</sup>) ν<sub>max</sub> 3358, 1609, 1509, 1398, 1294, 1238, 1068, 872, 820, 798, 771, 750; <sup>1</sup>H NMR (300 MHz, CDCl<sub>3</sub>) δ 9.59 (1H, s, ArOH), 7.79 (1H, d, *J* = 8.3 Hz, ArH), 7.33 (1H, dd, *J* = 8.0, 8.3 Hz, ArH), 6.92 (1H, s, ArH), 6.86 (1H, d, *J* = 8.0 Hz, ArH), 4.03 (3H, s, ArOCH<sub>3</sub>), 3.90 (3H, s, ArOCH<sub>3</sub>); <sup>13</sup>C NMR (75.5 Hz, CDCl<sub>3</sub>) δ 155.1, 148.1, 144.4, 127.2, 125.6, 116.2, 115.6, 110.1, 106.1, 102.8, 56.4, 56.0; MS *m/z* (rel. intensity) (EI) 284 (M<sup>+</sup> for C<sub>12</sub>H<sub>11</sub><sup>81</sup>BrO<sub>3</sub>, 99), 282 (M<sup>+</sup> for C<sub>12</sub>H<sub>11</sub><sup>79</sup>BrO<sub>3</sub>, 100), 269 (83), 267 (85), 254 (5), 252 (6), 241 (4), 239 (5), 226 (2), 224 (2), 187 (7), 173 (9), 159 (3), 145 (10), 129 (4), 101 (3), 89 (3); HRMS (EI) calc. for C<sub>12</sub>H<sub>11</sub><sup>79</sup>BrO<sub>3</sub>: 281.9892, found: 281.9888.

**2-Bromo-1,4,8-trimethoxynaphthalene (16).** To a stirred solution of 2-Bromo-4,8-dimethoxynaphthalen-1-ol (0.906 g, 3.2 mmol) in acetone (100 mL) was added K<sub>2</sub>CO<sub>3</sub> (3.187 g, 23.1 mmol) and dimethyl sulfate (1.8 mL, 19 mmol). The mixture was heated at reflux (60 °C oil bath) for 21 h. The solution was cooled to ambient temperature, filtered through Celite 545 and the solvent evaporated on a rotary evaporator. The residue was dissolved in ether (50 mL) and triethylamine (5 mL) and the solution was stirred for 25 min. The solution was then washed with 10% HCl twice, water once, brine once and dried over MgSO<sub>4</sub>, filtered and concentrated in vacuo to yield 1.155 g of dark orange brown solid that was purified by column chromatography (silica, 12:1 hexanes:ethyl acetate) affording 0.878 g (92%) of the title compound as a white solid: mp 81-82 °C (lit. value<sup>12</sup> 85-87 °C); IR (NaCl, film, cm<sup>-1</sup>) ν<sub>max</sub> 2934, 1576, 1508, 1450, 1413, 1337, 1326, 1267, 1071, 1006, 970, 874; <sup>1</sup>H NMR (300 MHz, CDCl<sub>3</sub>) δ 7.80 (1H, d, *J* = 8.3 Hz, ArH), 7.37 (1H, dd, *J* = 8.0, 8.3 Hz, ArH), 6.94 (1H, d, *J* = 8.0 Hz, ArH) overlapping with 6.93 (1H, s, ArH), 3.97 (3H, s, ArOCH<sub>3</sub>), 3.93 (3H, s, ArOCH<sub>3</sub>), 3.83 (3H, s, ArOCH<sub>3</sub>); <sup>13</sup>C NMR (75.5 MHz, CDCl<sub>3</sub>) δ 155.4, 151.7, 146.7, 128.1, 126.0, 121.2, 114.9, 114.1, 108.9, 107.9, 61.6, 56.4, 55.9; MS *m/z* (rel. intensity) (EI) 298 (M<sup>+</sup> for C<sub>13</sub>H<sub>13</sub><sup>81</sup>BrO<sub>3</sub>, 98), 296 (M<sup>+</sup> for C<sub>13</sub>H<sub>13</sub><sup>79</sup>BrO<sub>3</sub>, 100), 283 (23), 281 (24), 253 (4), 251 (3), 225 (3), 223 (4), 202 (57), 187 (32), 159 (11), 149 (4), 129 (8), 116 (6), 113 (4), 101 (4); HRMS (EI) for C<sub>13</sub>H<sub>13</sub><sup>79</sup>BrO<sub>3</sub>: 296.0048, found: 296.0058.

***N*-(Diphenylmethylene)-1,4,8-trimethoxynaphthalen-2-amine.** Following a known procedure,<sup>13</sup> a 25 mL two-neck flask was charged with bromonaphthalene **16** (0.202 g, 0.68 mmol), benzophenone imine (0.164 g, 0.91 mmol), sodium *tert*-butoxide (0.082 g, 0.86 mmol) and toluene (4 mL) under argon environment and the mixture was degassed with two freeze-thawing cycles under high vacuum with argon purges. To the frozen mixture was added Pd<sub>2</sub>(dba)<sub>3</sub> (0.002 g, 0.64 mol%) and (±) BINAP (0.007 g, 1.7 mol%) and the mixture was freeze-thawed twice again and then heated at 85 °C for 14 h. The mixture was allowed to cool, diluted with ether, filtered through Celite 545 and concentrated in vacuo to yield a yellow oil that was purified using flash silica column chromatography (4:1 than 2:1 hexanes:ether) producing 0.251 g (93%) of a bright yellow solid as the title compound: mp 160-162 °C; IR (NaCl, film, cm<sup>-1</sup>)

$\nu_{\max}$  3058, 2931, 2832, 1616, 1596, 1576, 1507, 1447, 1412, 1364, 1337, 1316, 1290, 1264, 1202, 1076, 1017;  $^1\text{H}$  NMR (300 MHz,  $\text{CDCl}_3$ )  $\delta$  7.85 to 7.83 (2H, m, ArH), 7.70 (1H, dd,  $J = 0.6, 8.4$  Hz, ArH), 7.51 to 7.40 (3H, m, ArH), 7.27 to 7.17 (6H, m, ArH), 6.84 (1H, d,  $J = 7.6$  Hz, ArH), 6.17 (1H, s, ArH), 3.90 (3H, s,  $\text{ArOCH}_3$ ), 3.83 (3H, s,  $\text{ArOCH}_3$ ), 3.69 (3H, s,  $\text{ArOCH}_3$ );  $^{13}\text{C}$  NMR (75.5 MHz,  $\text{CDCl}_3$ )  $\delta$  168.6, 156.2, 151.1, 141.6, 139.5, 137.7, 136.7, 130.6, 129.4, 128.8, 128.5, 128.1, 127.8, 125.4, 123.7, 121.4, 114.7, 107.7, 101.1, 60.1, 56.7, 55.6; MS  $m/z$  (mass intensity) (EI) 397 ( $\text{M}^+$ , 84), 382 (100), 367 (11), 352 (15), 290 (3), 280 (2), 230 (2), 191 (3), 165 (18), 160 (3), 105 (2); HRMS (EI) calc. for  $\text{C}_{26}\text{H}_{23}\text{NO}_3$ : 397.1678, found: 397.1668.

**1,4,8-Trimethoxynaphthalen-2-amine (18).** Following a known procedure,<sup>13</sup> a mixture of the imine (0.251 g, 0.63 mmol) obtained from the previous reaction, 5% palladium on carbon (0.162 g, 12 mol%) and ammonium formate (0.681 g, 10.9 mmol) in methanol (5 mL) was heated at reflux for 1 h 40 min. The mixture was cooled to room temperature and diluted ten-fold with dichloromethane. The mixture was filtered through a bed of Celite 545, washed once with 0.1 M NaOH, dried over sodium sulfate, filtered and concentrated in vacuo to give 0.232 g of a light brown solid that was further purified by flash silica gel chromatography (1:12 hexanes:ether) to afford 0.123 g (84%) of the title compound as a light tan solid: mp 118-119 °C (lit. value<sup>14</sup> 125 °C); IR (NaCl, film,  $\text{cm}^{-1}$ )  $\nu_{\max}$  3482, 3368, 2960, 1623, 1603, 1512, 1448, 1421, 1388, 1341, 1258, 1211, 1163, 1070;  $^1\text{H}$  NMR (300 MHz,  $\text{CDCl}_3$ )  $\delta$  7.72 (1H, dd,  $J = 0.6, 8.3$  Hz, ArH), 7.11 (1H, dd,  $J = 7.8, 8.3$  Hz, ArH), 6.83 Hz (1H, d,  $J = 7.8$  Hz, ArH), 6.40 (1H, s, ArH), 3.98 (2H, br s,  $\text{ArNH}_2$ ) overlapping with 3.96 (3H, s,  $\text{ArOCH}_3$ ), 3.90 (3H, s,  $\text{ArOCH}_3$ ), 3.78 (3H, s,  $\text{ArOCH}_3$ );  $^{13}\text{C}$  NMR (75.5 MHz,  $\text{CDCl}_3$ )  $\delta$  154.4, 152.2, 136.6, 133.6, 122.5, 121.7, 121.2, 114.9, 107.2, 97.8, 60.9, 56.1, 55.6; MS  $m/z$  (rel. intensity) (EI) 233 ( $\text{M}^+$ , 74), 218 (100), 201 (8), 173 (13), 159 (3), 145 (6), 130 (3), 116 (5), 102 (3), 101 (2), 89 (2), 76 (2), 63 (1), 51 (1); HRMS (EI) calc. for  $\text{C}_{13}\text{H}_{15}\text{NO}_3$ : 233.1052, found: 233.1059.

**5-Methyl-3-(1,4,8-trimethoxynaphthalen-2-ylamino)cyclohex-2-enone (20).** A mixture of naphthylamine **18** (0.099 g, 0.42 mmol), 5-methylcyclohexane-1,3-dione (0.055 g, 0.43 mmol), *p*-TsOH hydrate (0.011 g, 0.055 mmol) in toluene (4 mL) was heated at reflux for 6 h. The solution was cooled and the solvent evaporated in vacuo. The residue was purified by flash silica gel chromatography (ethyl acetate) providing the title compound as a white solid (0.125 g, 86%): mp 169-170 °C; IR (NaCl, film,  $\text{cm}^{-1}$ )  $\nu_{\max}$  3226, 2954, 1581, 1529, 1502, 1450, 1417, 1378, 1338, 1262, 1142, 1075, 1016;  $^1\text{H}$  NMR (300 MHz,  $\text{CDCl}_3$ )  $\delta$  7.80 (1H, d,  $J = 8.4$  Hz, ArH), 7.31 (1H, dd,  $J = 7.7, 8.4$  Hz, ArH), 6.89 (1H, d,  $J = 7.7$  Hz, ArH), 6.83 (1H, s, ArH), 6.43 (1H, br s, NH), 5.71 (1H, s, H2), 3.96 (3H, s,  $\text{ArOCH}_3$ ), 3.91 (3H, s,  $\text{ArOCH}_3$ ), 3.72 (3H, s,  $\text{ArOCH}_3$ ), 2.49 to 2.29 (4H, m, H4, H6), 2.12 to 2.04 (1H, m, H5), 1.12 (3H, d,  $J = 5.4$  Hz,  $\text{CHCH}_3$ );  $^{13}\text{C}$  NMR (75.5 Hz,  $\text{CDCl}_3$ )  $\delta$  198.1, 160.7, 155.4, 151.8, 141.1, 128.4, 126.1, 125.2, 120.4, 114.9, 107.4, 101.4, 99.9, 62.4, 56.1, 55.9, 44.9, 38.3, 29.3, 21.0; MS  $m/z$  (rel. intensity) (EI) 341 ( $\text{M}^+$ , 66), 326 (100), 310 (4), 294 (4), 278 (3), 240 (5), 217 (5), 204 (3), 189 (2), 141 (2), 120 (6), 103 (2), 69 (3), 57 (1); HRMS (EI) calc. for  $\text{C}_{20}\text{H}_{23}\text{NO}_4$ : 341.1627, found: 341.1628.

**6,7,11-Trimethoxy-3-methyl-3,4-dihydro-2H-benzo[*b*]carbazol-1(5H)-one (21).** From a modification of procedures described by Akermark,<sup>15</sup> a mixture of the anilino ketone **20** (0.032

g, 0.09 mmol), palladium acetate (0.043 g, 0.189 mmol) in glacial acetic acid (5 mL) was heated at 95 °C for 90 min. The mixture was cooled to ambient temperature, filtered through a small pad of Celite 545 and the residue concentrated under reduced pressure and purified by column chromatography (silica, 1:7 hexanes:ethyl acetate) to furnish 0.015 g (51%) of a light brown solid as the title compound: m.p. > 260 °C decomposition; IR (NaCl, film,  $\text{cm}^{-1}$ )  $\nu_{\text{max}}$  3231, 3072, 2996, 2956, 2929, 2840, 1620, 1543, 1505, 1479, 1465, 1445, 1428, 1395, 1357, 1263, 1247, 1215, 1134, 1100, 1058, 1004;  $^1\text{H}$  NMR (500 MHz,  $\text{CDCl}_3$ )  $\delta$  9.15 (1H, br s, *NH*), 7.96 (1H, d,  $J$  = 8.7 Hz, *ArH*), 7.27 (1H, dd,  $J$  = 7.5, 8.7 Hz, *ArH*), 6.79 (1H, d,  $J$  = 7.5 Hz, *ArH*), 4.03 (3H, s, *ArOCH*<sub>3</sub>), 4.00 (3H, s, *ArOCH*<sub>3</sub>), 3.99 (3H, s, *ArOCH*<sub>3</sub>), 3.05 (1H, dd,  $J$  = 4.3, 16.5 Hz, *H*<sub>4</sub>), 2.69 to 2.63 (2H, m, *H*<sub>2</sub>, *H*<sub>4</sub>), 2.50 to 2.44 (1H, m, *H*<sub>3</sub>), 2.36 (1H, dd,  $J$  = 11.7, 15.8 Hz, *H*<sub>2</sub>), 1.16 (3H, d,  $J$  = 6.5 Hz, *CHCH*<sub>3</sub>);  $^{13}\text{C}$  NMR (125.8 MHz,  $\text{CDCl}_3$ )  $\delta$  191.1, 155.5, 154.9, 145.4, 135.7, 130.7, 127.4, 123.2, 118.2, 117.0, 115.9, 112.6, 103.8, 63.7, 63.0, 55.9, 47.2, 32.2, 30.8, 21.2; MS  $m/z$  (rel. intensity) (EI) 339 ( $\text{M}^+$ , 66), 324 (100), 310 (4), 267 (5), 239 (3), 218 (6), 186 (7), 170 (9), 142 (13), 129 (41), 104 (33), 91 (10), 57 (5); HRMS (EI) calc. for  $\text{C}_{20}\text{H}_{21}\text{NO}_4$ : 339.1471, found: 339.1480.

### **6,7,11-Trimethoxy-3-methyl-1-oxo-3,4-dihydro-1*H*-benzo[*b*]carbazole-5(2*H*)-carbonitrile.**

A solution of the carbazole **21** (0.017 g, 0.051 mmol), phenyl cyanate<sup>16</sup> (0.040 mL, 0.37 mmol) and triethylamine (0.030 mL, 0.21 mmol) in dry DMSO (0.8 mL) was stirred at room temperature for 4 h after which another 2 drops of triethylamine (~0.012 g, 0.12 mmol) was added and stirring was continued overnight. The solution was then diluted with water (10 mL) and extracted with ethyl acetate three times and the organic extracts were pooled. The pooled extracts were washed three times with water, brine once and dried over  $\text{Na}_2\text{SO}_4$ , filtered and concentrated under reduced pressure to yield the title compound as a light tan solid (0.019 g, 99%): mp 183-184 °C; IR (NaCl, film,  $\text{cm}^{-1}$ )  $\nu_{\text{max}}$  2930, 2841, 2244, 1752, 1680, 1613, 1570, 1508, 1452, 1408, 1391, 1356, 1342, 1266, 1099, 1066, 1044, 997, 967, 912, 882, 810, 761, 729;  $^1\text{H}$  NMR ( $\text{CDCl}_3$ , 300 MHz)  $\delta$  7.92 (1H, d,  $J$  = 8.6 Hz, *ArH*), 7.39 (1H, dd,  $J$  = 7.6, 8.6 Hz, *ArH*), 6.89 (1H, d,  $J$  = 7.6 Hz, *ArH*), 4.024 (3H, s, *ArOCH*<sub>3</sub>), 4.019 (3H, s, *ArOCH*<sub>3</sub>), 3.95 (3H, s, *ArOCH*<sub>3</sub>), 3.23 (1H, dd,  $J$  = 4.2, 17.5 Hz, *H*<sub>4</sub>), 2.81 to 2.71 (2H, m, *H*<sub>2</sub>, *H*<sub>4</sub>), 2.66 to 2.49 (1H, m, *H*<sub>3</sub>), 2.42 (1H, dd,  $J$  = 11.6, 15.5 Hz, *H*<sub>2</sub>), 1.26 (3H, d,  $J$  = 6.3 Hz, *CHCH*<sub>3</sub>);  $^{13}\text{C}$  NMR (75.5 MHz,  $\text{CDCl}_3$ )  $\delta$  190.7, 155.9, 154.3, 146.2, 138.3, 129.6, 128.4, 125.4, 118.8, 117.3, 116.6, 115.7, 106.3, 105.7, 64.7, 64.1, 56.1, 47.1, 30.7, 30.2, 21.0; MS  $m/z$  (rel. intensity) (EI) 364 ( $\text{M}^+$ , 99), 349 (100), 335 (4), 322 (2), 292 (3), 264 (3), 237 (3), 182 (4), 149 (2), 126 (3), 111 (1), 69 (11), 57 (1); HRMS (EI) calc. for  $\text{C}_{21}\text{H}_{20}\text{N}_2\text{O}_4$ : 364.1423, found: 364.1414.

### **7-Methoxy-3-methyl-1,6,11-trioxo-3,4,6,11-tetrahydro-1*H*-benzo[*b*]carbazole-5(2*H*)-carbonitrile (22).**

The cyanamide (0.012 g, 0.033 mmol) obtained from the previous reaction was dissolved in acetonitrile (1 mL) and the solution cooled to 0 °C. To this solution was added ceric ammonium nitrate (0.048 g, 0.087 mmol) dissolved in distilled water (0.3 mL), in 0.04 mL aliquots over a 5 min period. The solution was then allowed to come to room temperature over a period of 10 minutes and water (20 mL) was added. This mixture was extracted with  $\text{CH}_2\text{Cl}_2$  four times and the extracts were pooled, washed with water, a saturated solution of  $\text{NaHCO}_3$ , water, brine and dried over  $\text{Na}_2\text{SO}_4$ . The solution was then filtered and concentrated in vacuo to give the crude product as an orange solid which was purified chromatographically (silica, 2:5



then 1:5 hexanes:ethyl acetate) to afford the title compound as an orange solid (0.011 g, 95%): mp > 240 °C decomposition; IR (CDCl<sub>3</sub>, cm<sup>-1</sup>)  $\nu_{\max}$  3693, 2259, 1701, 1662, 1586, 1528, 1472, 1454, 1440, 1408, 1298, 1272, 1240, 1168, 1041, 1005, 929; <sup>1</sup>H NMR (300 MHz, CDCl<sub>3</sub>)  $\delta$  7.89 (1H, d, *J* = 7.7 Hz, Ar*H*), 7.71 (1H, dd, *J* = 7.7, 8.4 Hz, Ar*H*), 7.31 (1H, d, *J* = 8.4 Hz, Ar*H*), 4.03 (3H, s, ArOCH<sub>3</sub>), 3.18 (1H, dd, *J* = 4.4, 17.3 Hz, H<sub>4</sub>), 2.77 to 2.66 (2H, m, H<sub>2</sub>, H<sub>4</sub>), 2.60 to 2.49 (1H, m, H<sub>3</sub>) 2.40 (1H, dd, *J* = 11.4, 15.7 Hz, H<sub>2</sub>), 1.24 (3H, d, *J* = 6.4 Hz, CHCH<sub>3</sub>); <sup>13</sup>C NMR (75.5 MHz, CDCl<sub>3</sub>)  $\delta$  190.0, 177.2, 174.0, 160.7, 152.7, 136.1, 136.0, 135.7, 124.1, 120.9, 120.5, 118.4, 118.0, 103.3, 56.6, 47.1, 30.3, 29.9, 20.9; MS *m/z* (rel. intensity) (EI) 334 (M<sup>+</sup>, 100), 321 (19), 307 (11), 292 (37), 279 (19), 264 (41), 237 (63), 221 (5), 206 (6), 178 (4), 151 (4), 105 (6), 76 (6), 51 (2); HRMS calc. for C<sub>19</sub>H<sub>14</sub>N<sub>2</sub>O<sub>4</sub>: 334.0954, found: 334.0951.

**1-((*tert*-Butyldimethylsilyl)oxy)-7-methoxy-3-methyl-6,11-dioxo-6,11-dihydro-3*H*-benzo[*b*]carbazole-5(4*H*)-carbonitrile (23).** Following a procedure described by Mander and Sethi,<sup>17</sup> *N*-cyanocarbazoloquinone **22** (0.216 g, 0.65 mmol) was dissolved in dichloromethane (12 mL) and the solution was cooled to 0 °C. To this was added TBSOTf (0.24 mL, 1.05 mmol) and the mixture was stirred for 2 min. Triethylamine (0.25 mL, 1.79 mmol) was added and was stirring continued at room temperature for 1 h. Dichloromethane was then added and the reaction was quenched with an excess of an ice cold solution of saturated sodium bicarbonate. The organic phase was dried over sodium sulfate, evaporated in vacuo and purified by flash silica column chromatography (2:3 hexanes:ether) to afford 0.103 g (35%) of the title compound as an orange solid: IR (CDCl<sub>3</sub>, cm<sup>-1</sup>)  $\nu_{\max}$  2961, 2932, 2860, 1679, 1652, 1619, 1586, 1509, 1471, 1439, 1418, 1365, 1339, 1279, 1253, 1235, 1186, 1165, 1141, 1026, 1012, 994, 974, 944; <sup>1</sup>H NMR (300 MHz, CDCl<sub>3</sub>)  $\delta$  7.83 (1H, d, *J* = 7.5 Hz, Ar*H*), 7.65 (1H, dd, *J* = 7.5, 8.2 Hz, Ar*H*), 7.26 overlapping with CHCl<sub>3</sub> peak (1H, d, *J* = 8.2 Hz, Ar*H*), 4.96 (1H, d, *J* = 3.9 Hz, H<sub>2</sub>), 4.01 (3H, s, ArOCH<sub>3</sub>), 2.95 (1H, dd, *J* = 7.3, 16.1 Hz, H<sub>4</sub>), 2.88 to 2.76 (1H, m, H<sub>3</sub>), 2.55 (1H, dd, *J* = 9.6, 16.1 Hz, H<sub>4</sub>), 1.14 (3H, d, *J* = 6.8 Hz, CHCH<sub>3</sub>), 0.98 (9H, s, SiC(CH<sub>3</sub>)<sub>3</sub>), 0.21 (3H, s, Si(CH<sub>3</sub>)), 0.19 (3H, s, Si(CH<sub>3</sub>)); <sup>13</sup>C NMR (75.5 MHz, CDCl<sub>3</sub>)  $\delta$  177.7, 173.7, 160.5, 144.5, 141.9, 136.6, 135.2, 134.4, 123.4, 120.3, 119.9, 119.0, 117.5, 110.6, 104.2, 56.5, 29.3, 28.2, 26.0, 20.7, 18.7, -4.26, -4.31; MS *m/z* (rel. intensity) (EI) 448 (M<sup>+</sup>, 1), 433 (3), 391 (100), 364 (20), 349 (12), 320 (8), 319 (4), 292 (3), 279 (2), 262 (1), 174 (3), 149 (3), 111(1), 73 (5), 57 (3); HRMS (EI) calc. for C<sub>21</sub>H<sub>19</sub>O<sub>4</sub>N<sub>2</sub>Si (M<sup>+</sup> - *t*Bu): 391.1114, found: 391.1110.

**1-((*tert*-Butyldimethylsilyl)oxy)-7-methoxy-3-methyl-6,11-dioxo-6,11-dihydro-5*H*-benzo[*b*]carbazole-5-carbonitrile.** Silyl enol ether **23** (0.005 g, 0.011 mmol) was dissolved in benzene (1 mL) and DDQ (0.003 g, 0.013 mmol) was added and stirring was continued for 3.5 h at room temperature. The reaction mixture was diluted with dichloromethane (10 mL), concentrated under reduced pressure and the residue purified by column chromatography (silica, 1:3 hexanes:ether) to yield a yellow solid (0.005 g, 88%) as the title compound: IR (CDCl<sub>3</sub>, cm<sup>-1</sup>)  $\nu_{\max}$  2932, 2860, 1675, 1657, 1615, 1587, 1576, 1549, 1500, 1471, 1437, 1415, 1373, 1352, 1321, 1280, 1253, 1232, 1183, 1133, 1106, 1070, 1032, 1014; <sup>1</sup>H NMR (300 MHz, CDCl<sub>3</sub>)  $\delta$  7.89 (1H, d, *J* = 7.8 Hz, Ar*H*), 7.69 (1H, dd, *J* = 7.8, 8.4 Hz, Ar*H*), 7.29 (1H, d, *J* = 8.4 Hz, Ar*H*), 7.12 (1H, s, Ar*H*), 6.72 (1H, s, Ar*H*), 4.03 (3H, s, ArOCH<sub>3</sub>), 2.47 (3H, s, ArCH<sub>3</sub>), 1.05 (9H, s, SiC(CH<sub>3</sub>)<sub>3</sub>), 0.32 (6H, s, Si(CH<sub>3</sub>)<sub>2</sub>); <sup>13</sup>C NMR (75.5 MHz, CDCl<sub>3</sub>)  $\delta$  177.5, 175.3, 160.4, 152.3, 142.0, 141.1, 136.5, 136.3, 135.7, 122.4, 120.4, 118.9, 118.1, 117.5, 114.5, 105.0, 104.8,

56.5, 26.1, 22.1, 18.9, -3.8; MS  $m/z$  (rel. intensity) (EI) 431 (2), 405 (4), 389 (100), 374 (13), 362 (36), 346 (11), 334 (14), 332 (5), 304 (3), 288 (2), 261 (1), 181 (3), 173 (2), 152 (1), 97(1), 73 (1), 57 (2); HRMS (EI) calc. for  $C_{21}H_{17}O_4N_2Si$  ( $M^+ - tBu$ ): 389.0958, found: 389.0959.

**1,7-Dihydroxy-3-methyl-6,11-dioxo-6,11-dihydro-5H-benzo[*b*]carbazole-5-carbonitrile (4).**

*N*-Cyanocarbazoloquinone (0.075 g, 0.168 mmol) obtained from the previous reaction was dissolved in dichloromethane (7 mL) and the solution was cooled to  $-78$  °C. To this was added  $BBr_3$  (1.2 mL of a 1 M solution in  $CH_2Cl_2$ , 1.2 mmol) and the mixture was stirred for 40 min, allowed to come to room temperature over a 15 min period and then quenched with an ice cold solution of saturated sodium bicarbonate. The mixture was diluted with dichloromethane, washed with water, dried over  $Na_2SO_4$ , filtered and the solvent evaporated in vacuo. The crude material was purified by flash silica gel chromatography (1:1 then 2:3 hexanes:ether) to afford the target compound as a blackish-purple solid (0.018 g, 34%): IR ( $CDCl_3$ ,  $cm^{-1}$ )  $\nu_{max}$  3692, 3208, 3123, 2927, 2247, 1627, 1593, 1553, 1455, 1430, 1408, 1300, 1250, 1219, 1184, 1164, 1089;  $^1H$  NMR (500 MHz,  $CDCl_3$ )  $\delta$  11.81 (1H, s, ArOH), 10.17 (1H, s, ArOH), 7.82 (1H, d,  $J = 7.5$  Hz, ArH), 7.67 (1H, dd,  $J = 7.5, 8.1$  Hz, ArH), 7.34 (1H, d,  $J = 8.1$  Hz, ArH), 7.01 (1H, s, ArH), 6.79 (1H, s, ArH), 2.49 (3H, s, ArCH<sub>3</sub>);  $^{13}C$  NMR (125.8 MHz,  $CDCl_3$ )  $\delta$  182.2, 179.4, 162.9, 153.1, 145.5, 140.8, 136.9, 133.2, 132.0, 126.8, 124.9, 121.4, 114.6, 113.7, 111.1, 104.4, 103.1, 22.5; MS  $m/z$  (rel. intensity) (EI) 318 ( $M^+$ , 100), 293 (6), 289 (3), 261 (2), 219 (3), 190 (3), 159 (3), 115 (1), 87 (2); HRMS (EI) calc. for  $C_{18}H_{10}N_2O_4$ : 318.0641, found: 318.0645.

## 5. $^1\text{H}$ and $^{13}\text{C}$ NMR spectra

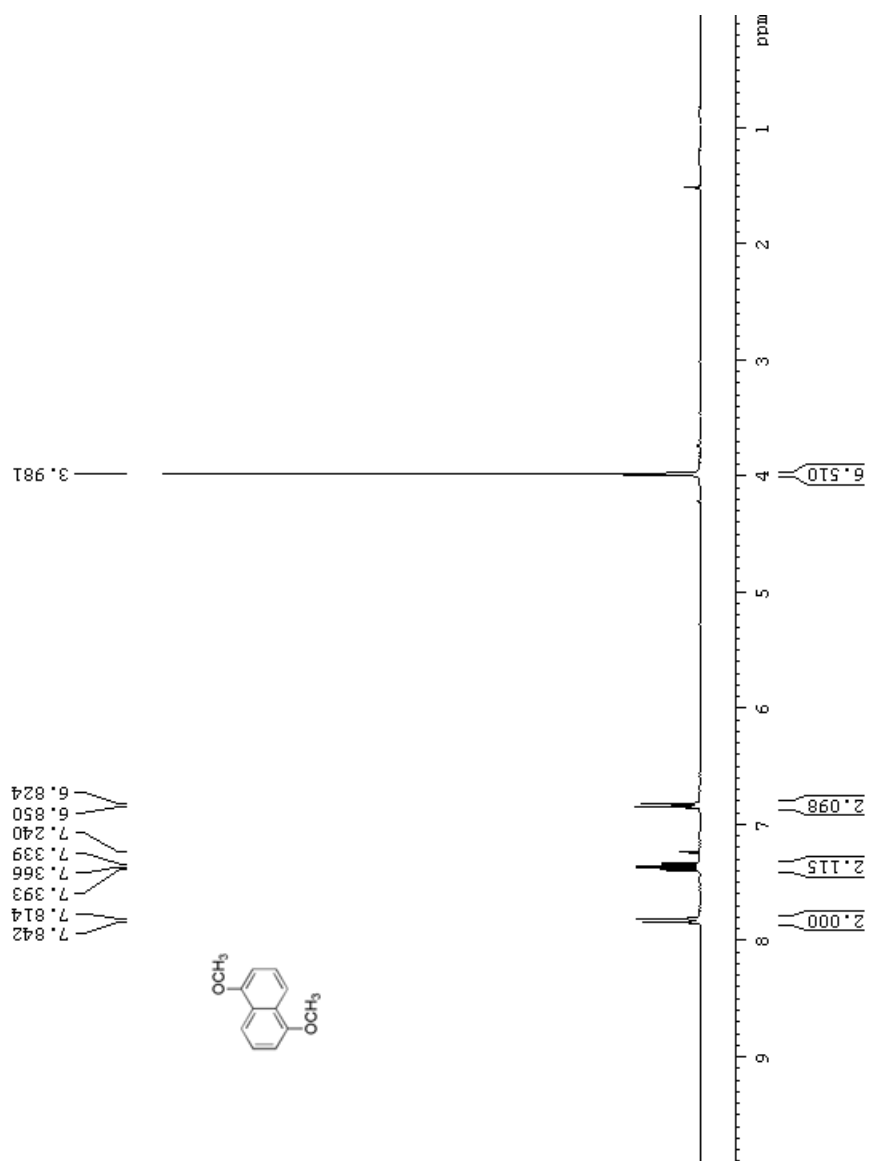

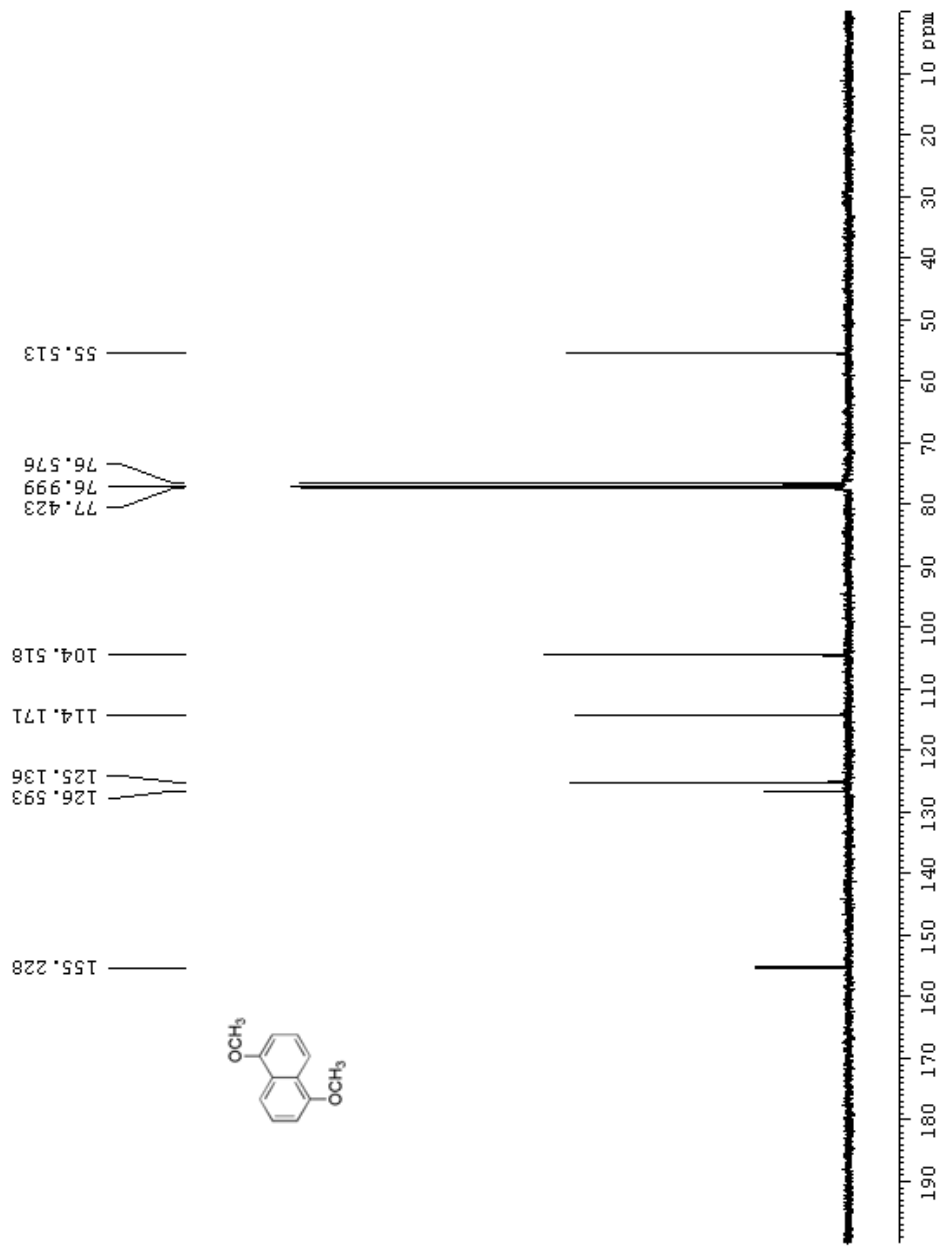

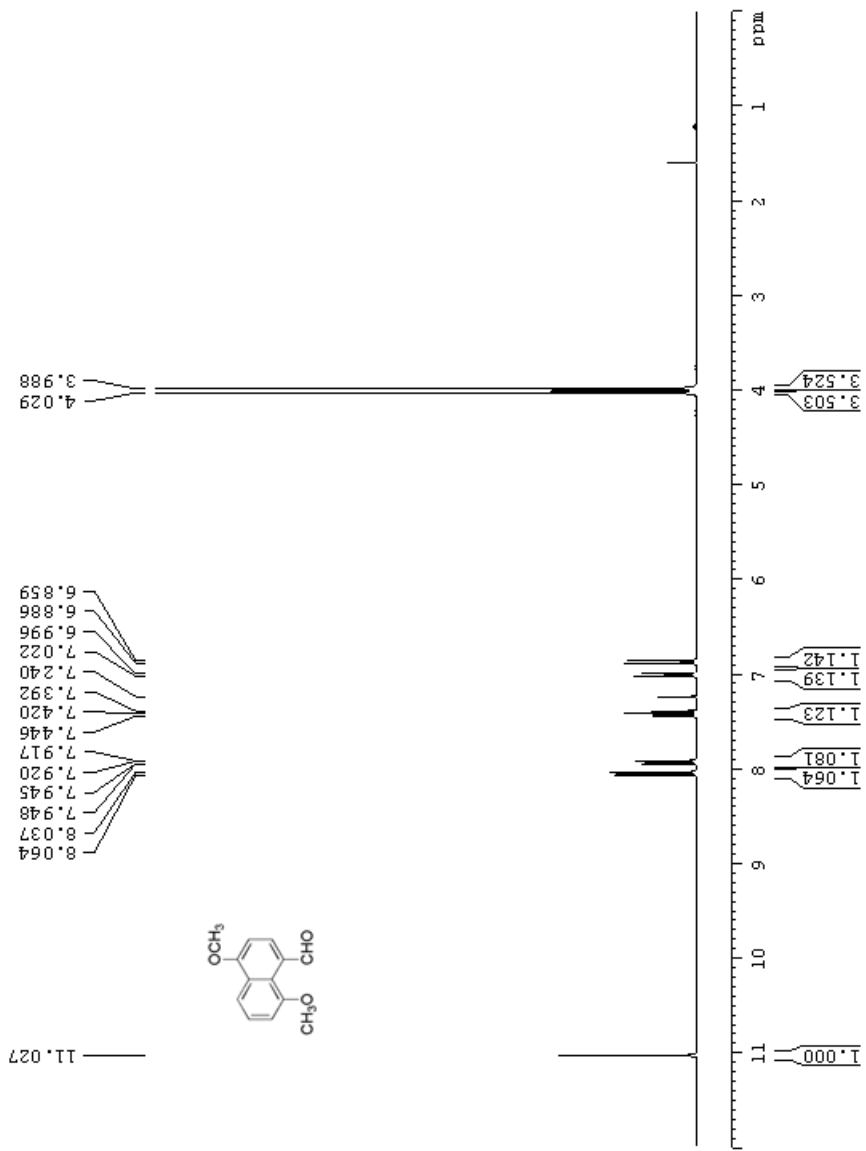

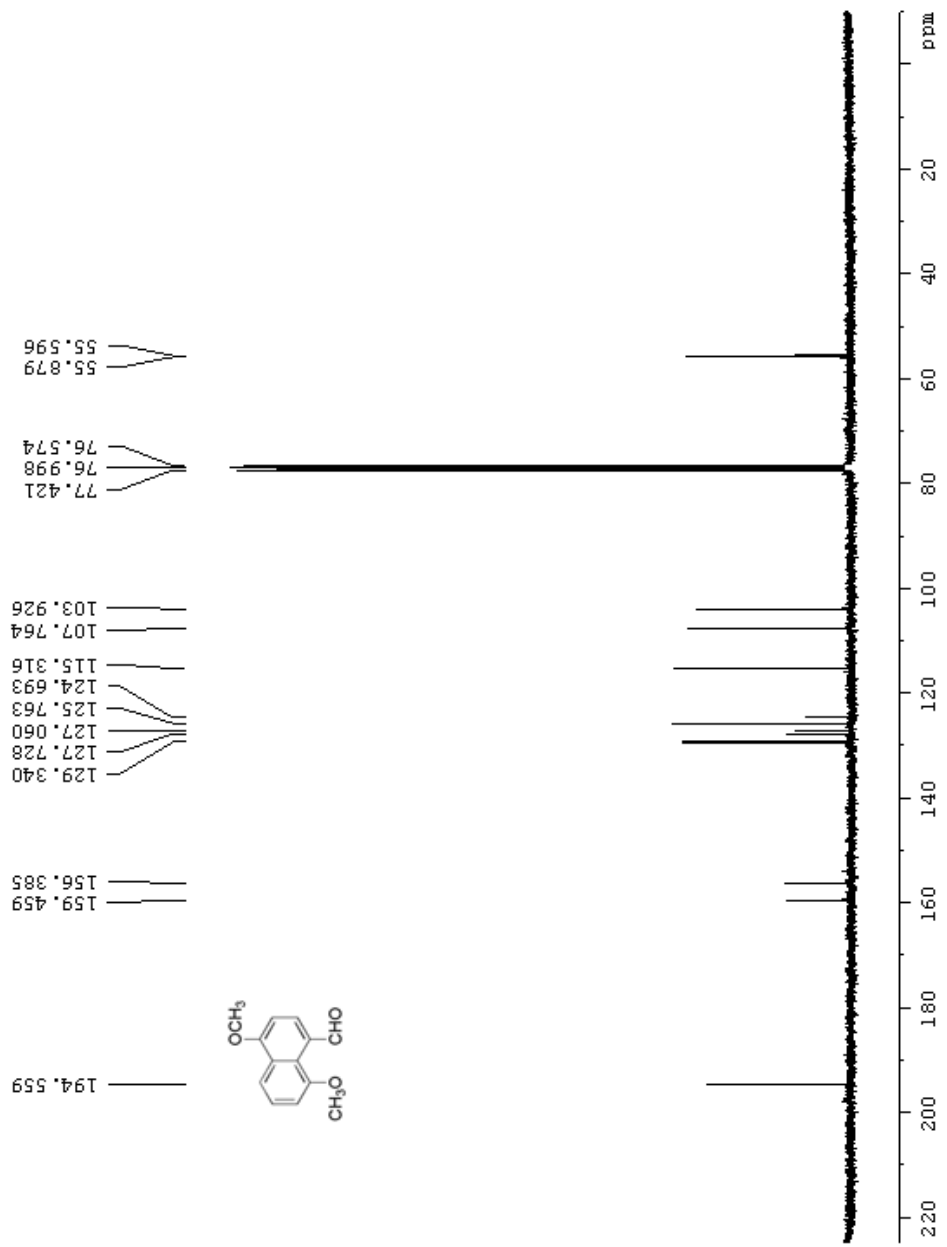

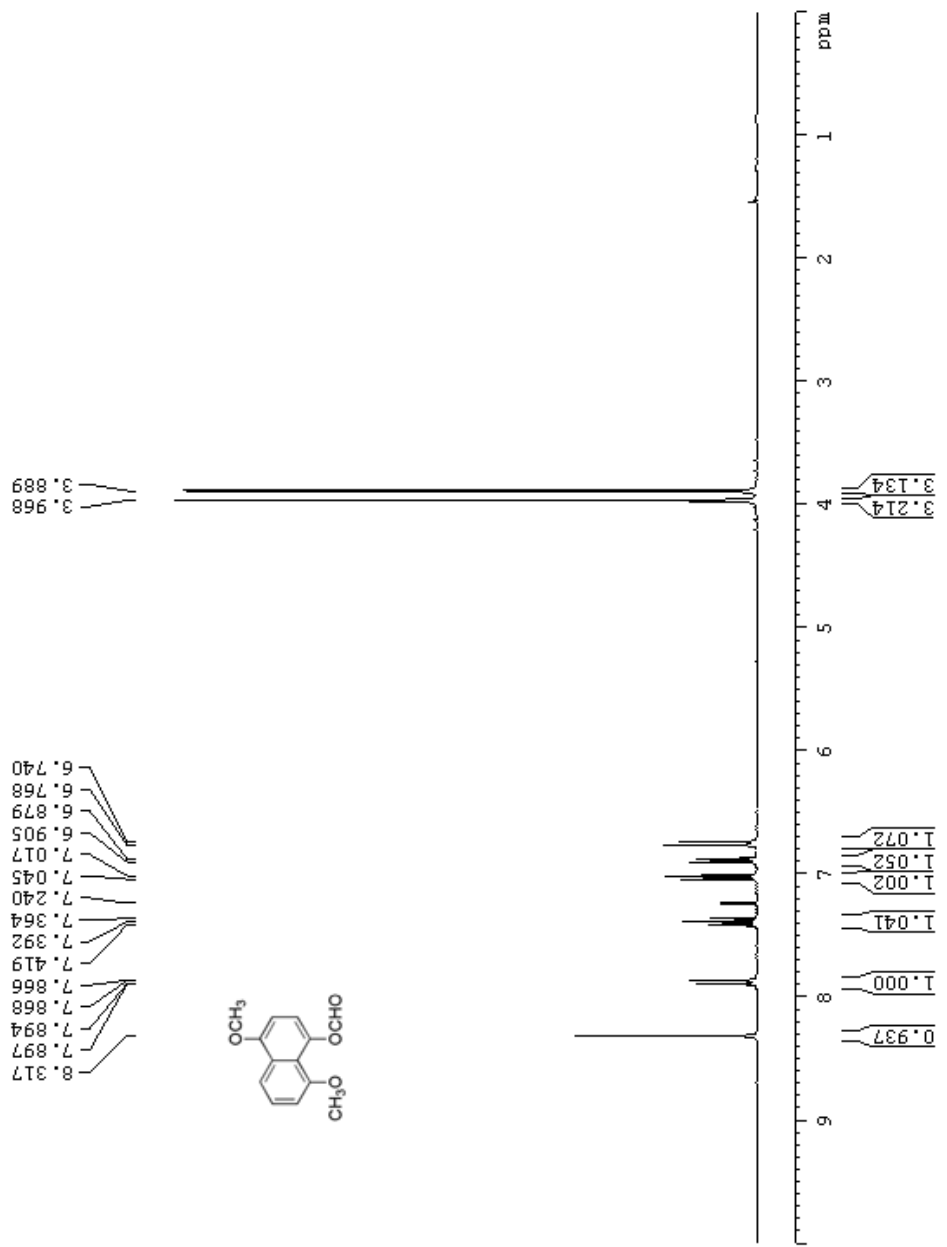

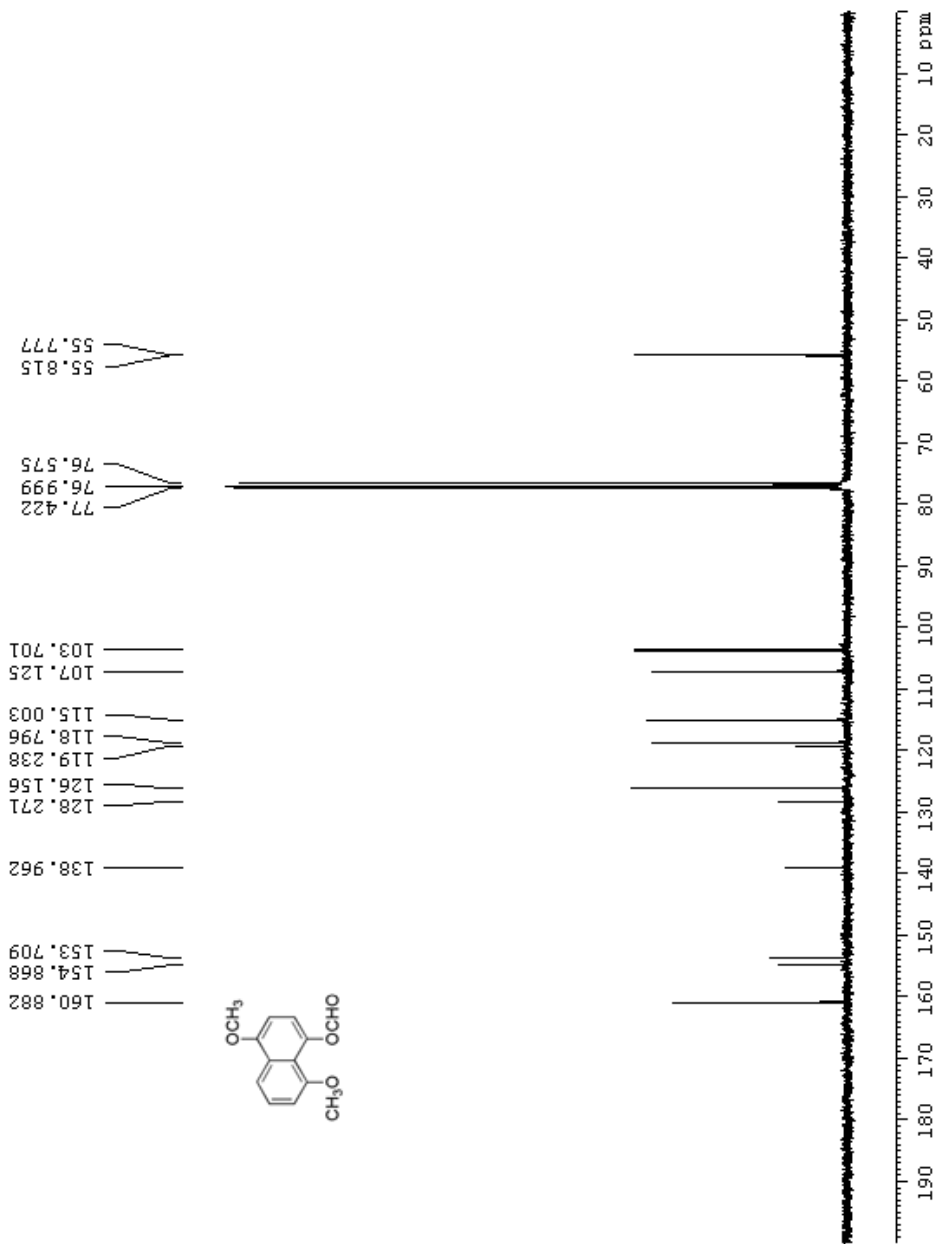



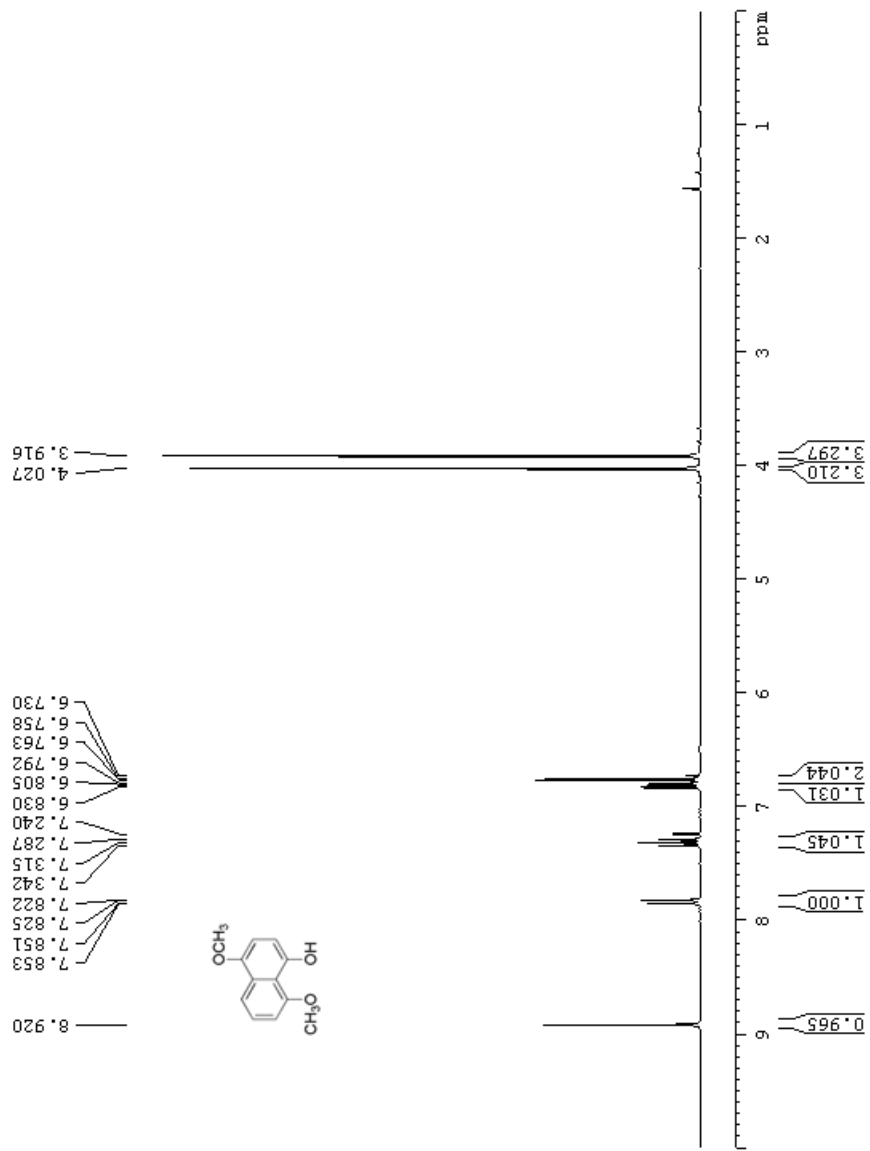

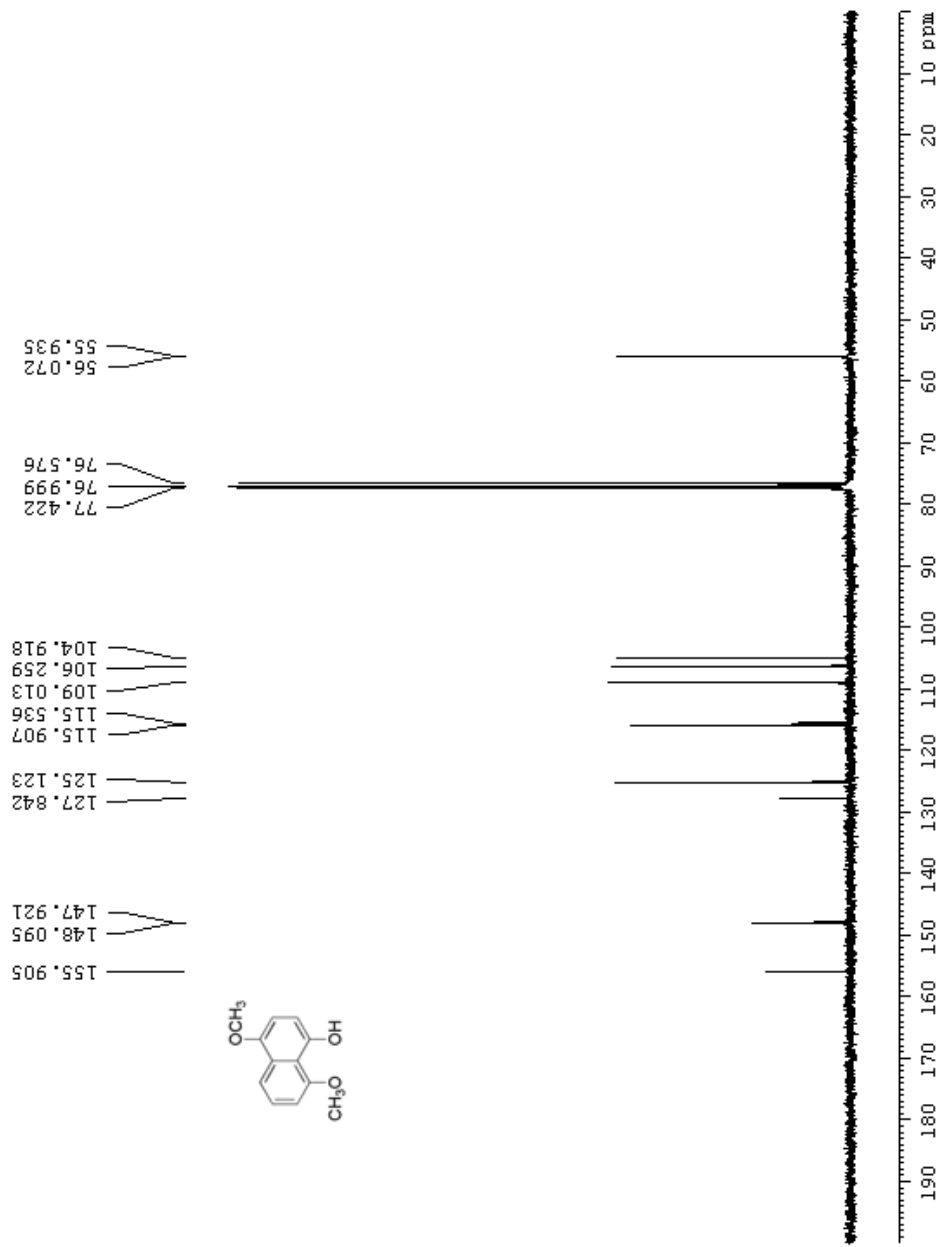

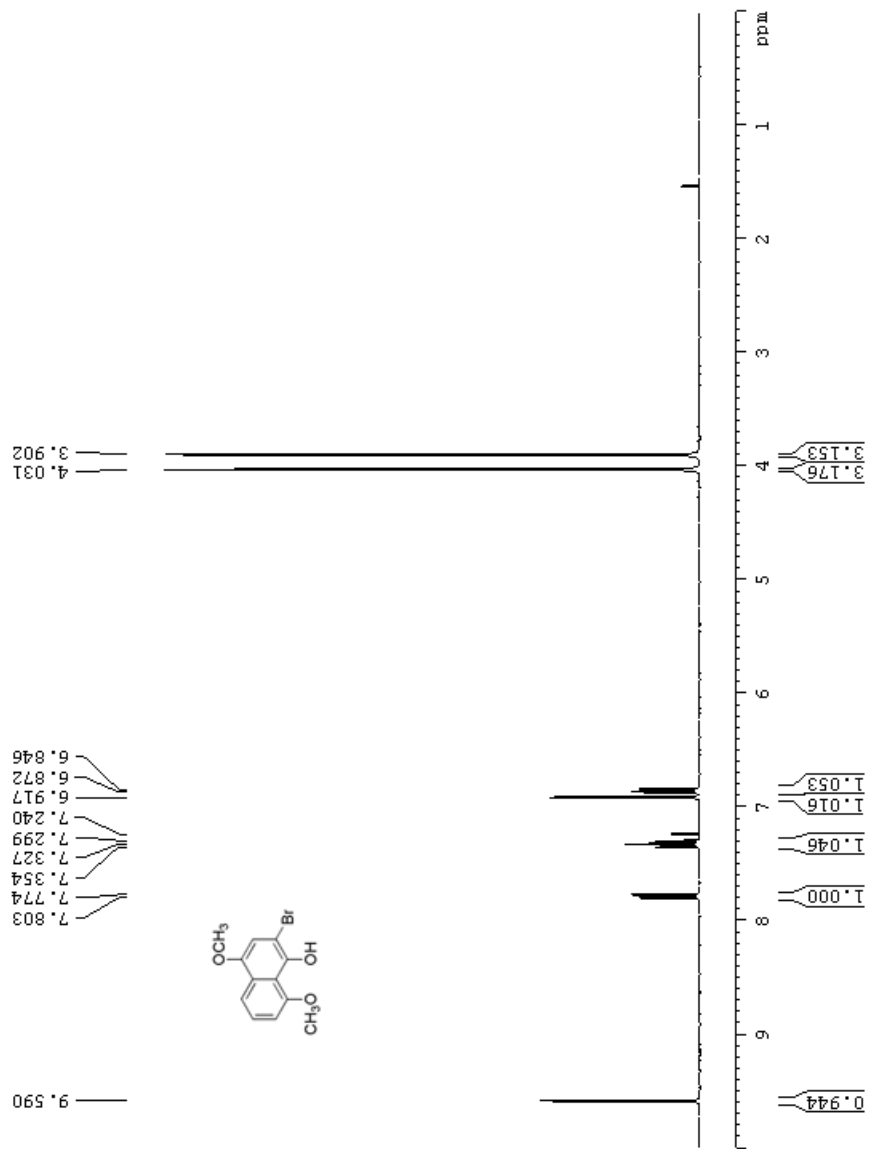

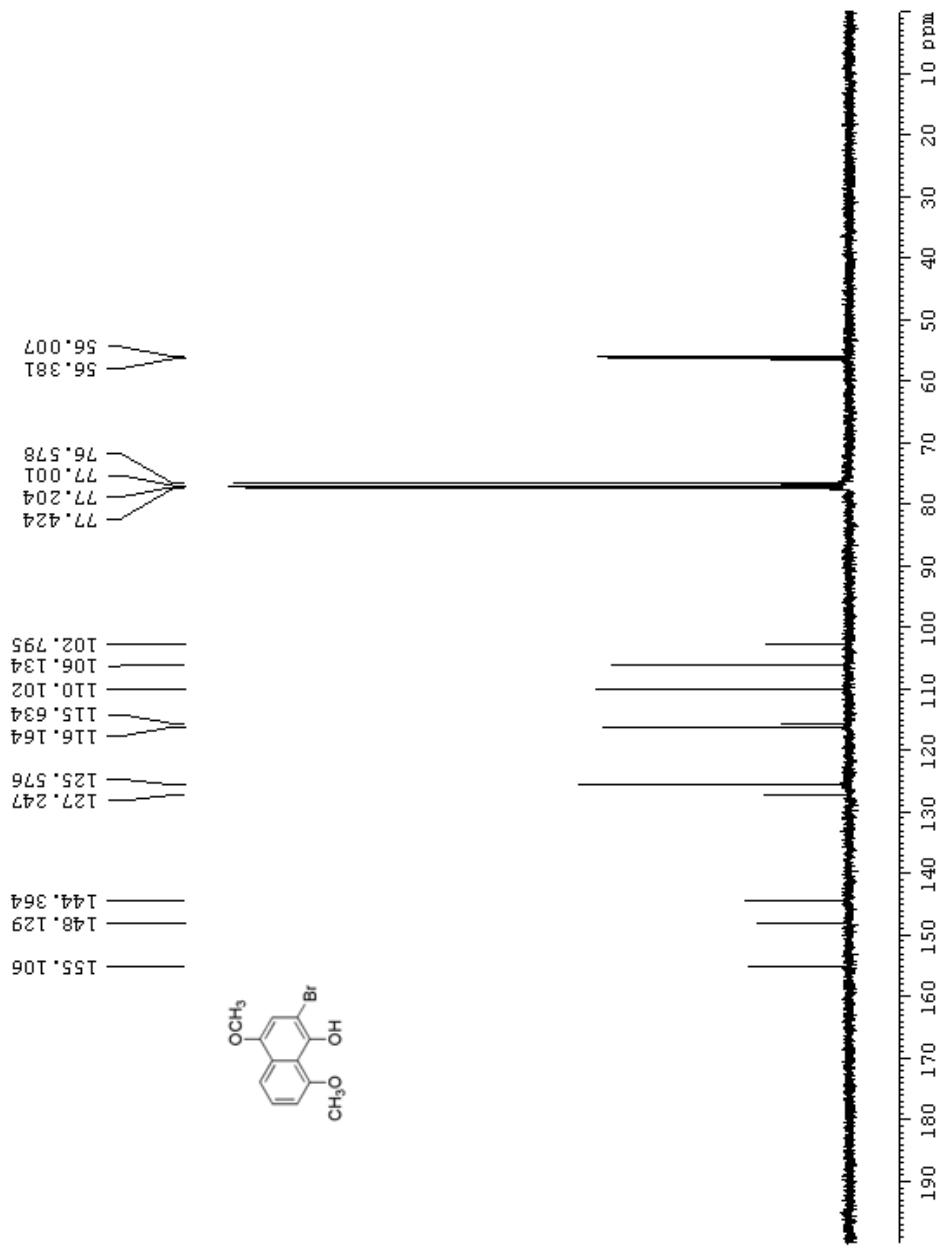

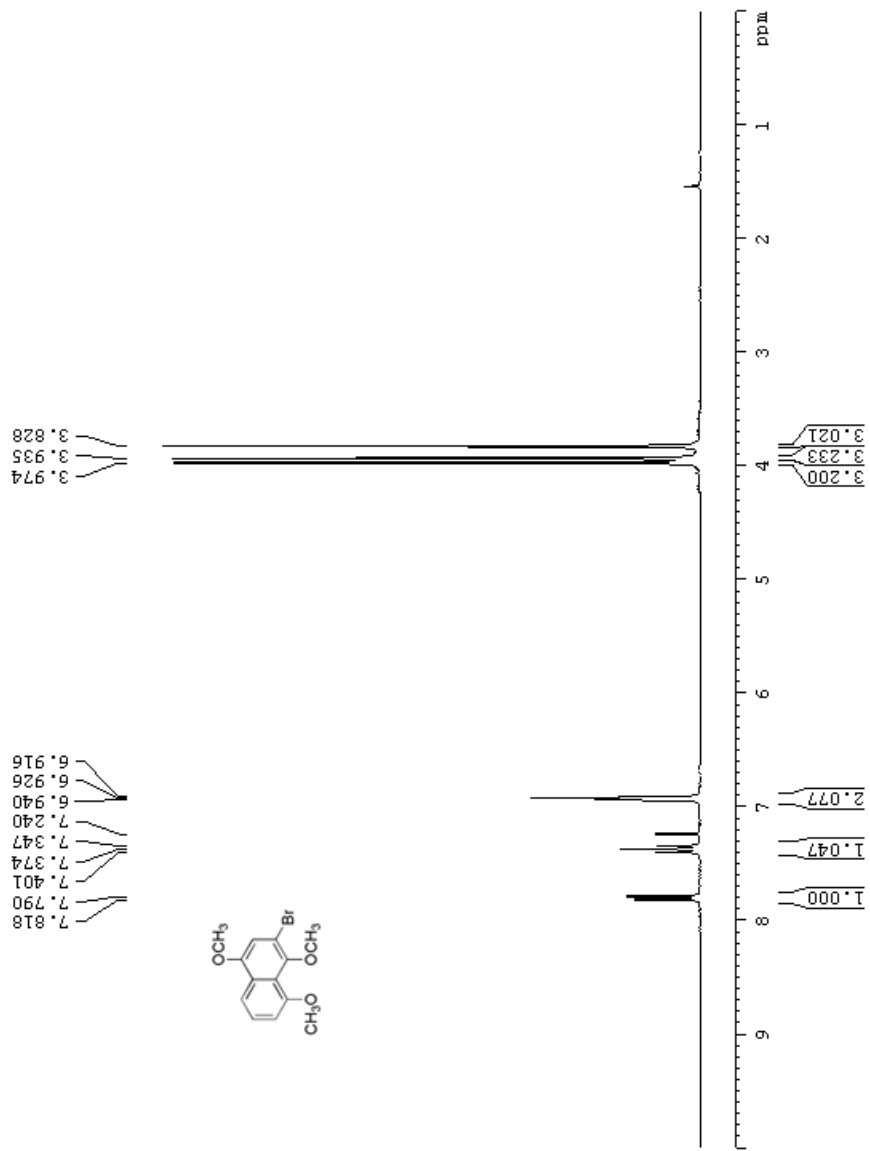

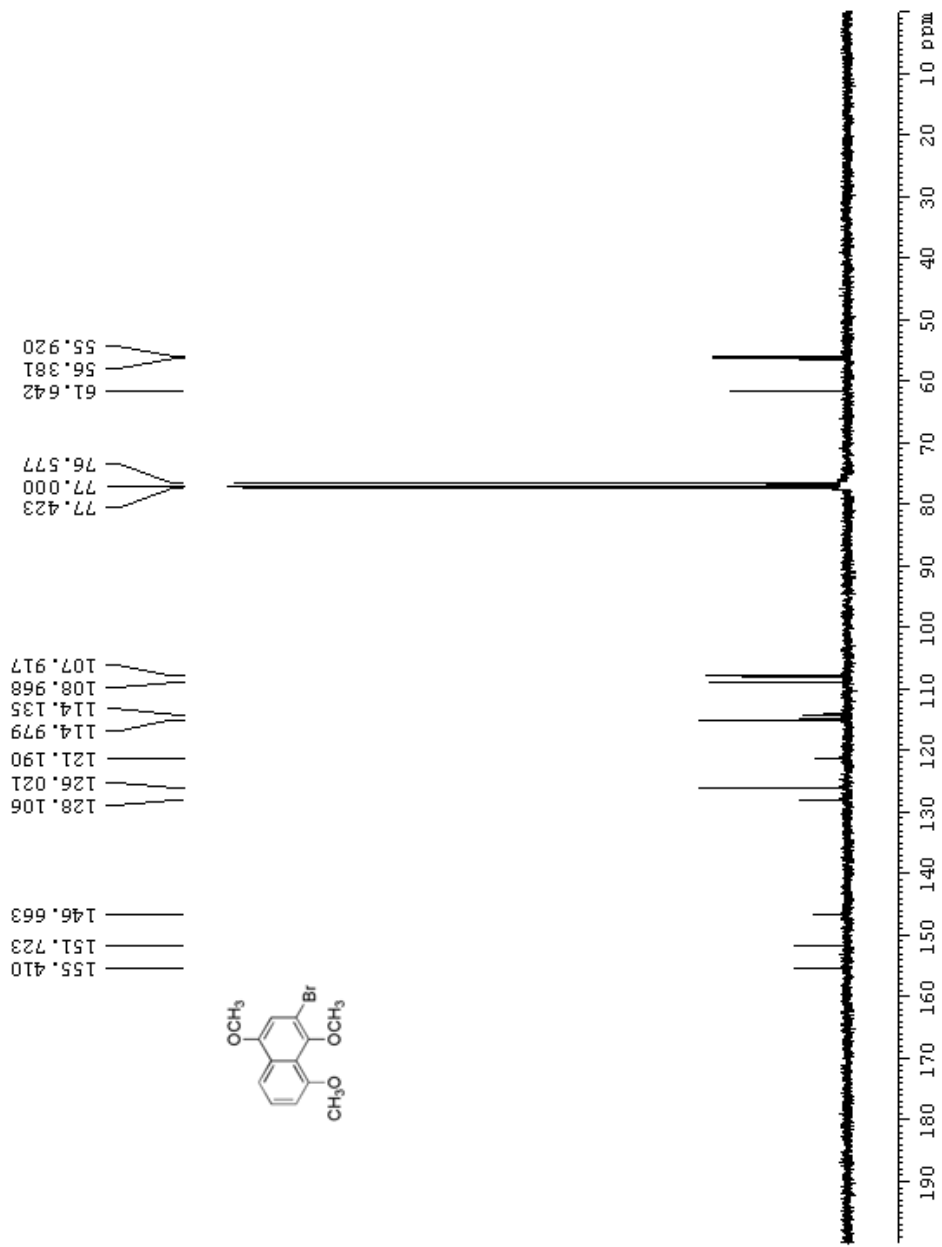

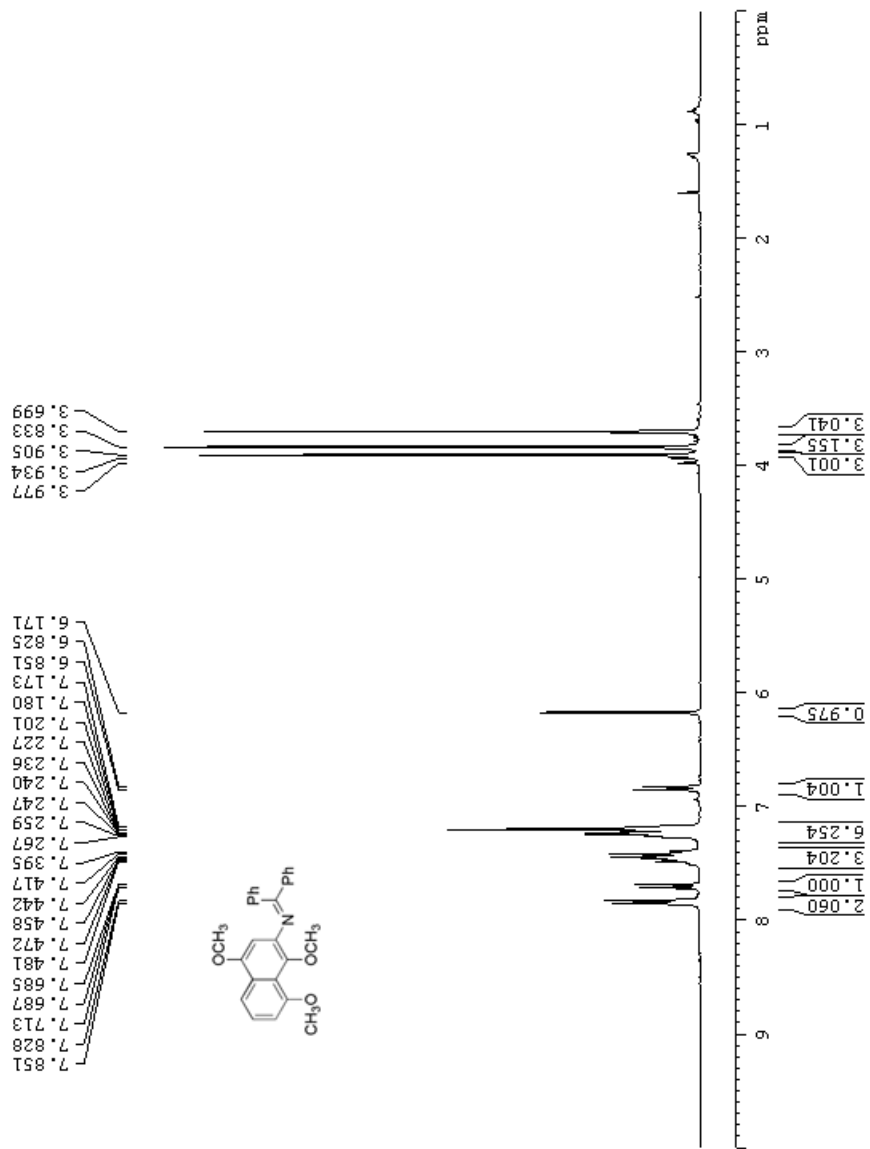

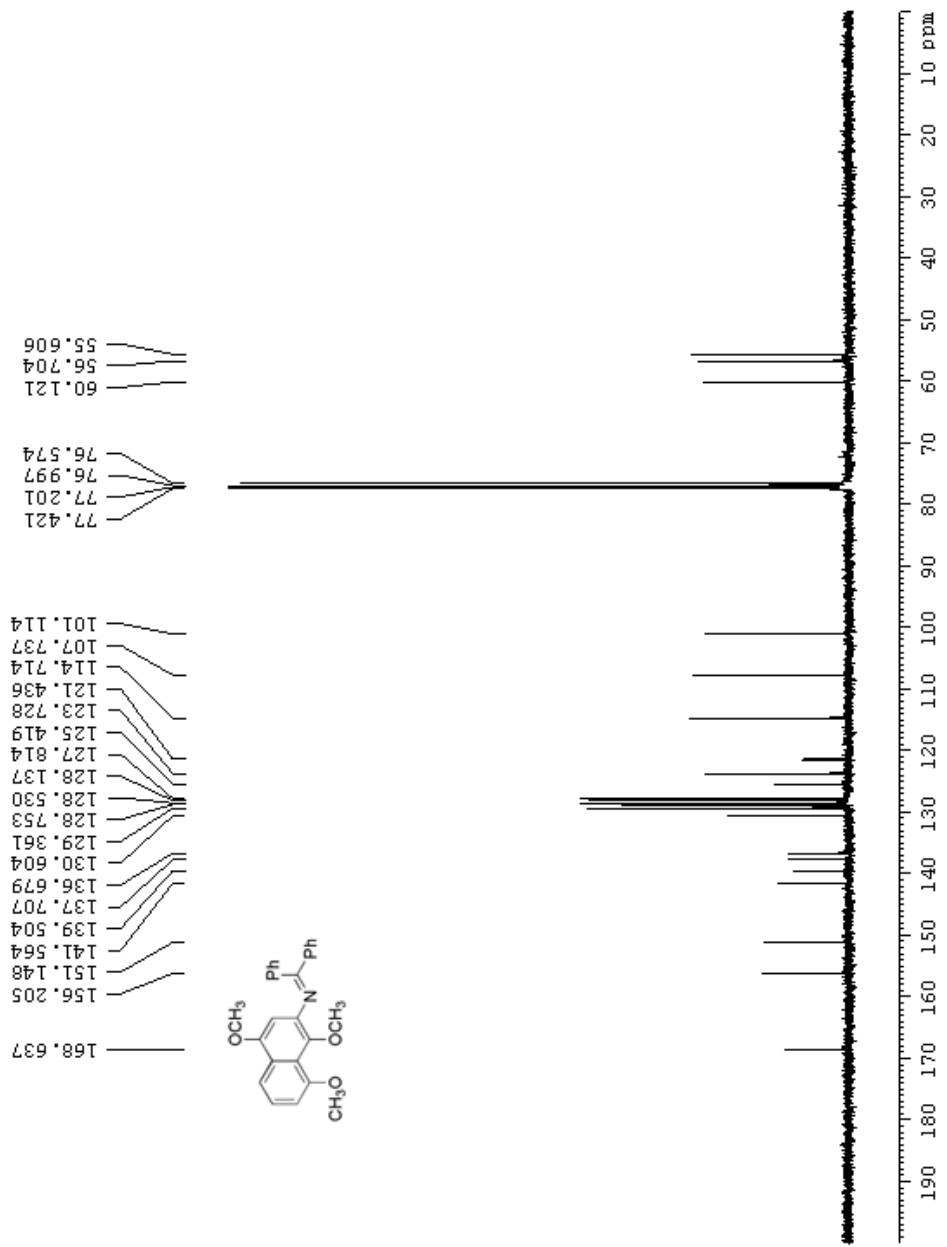



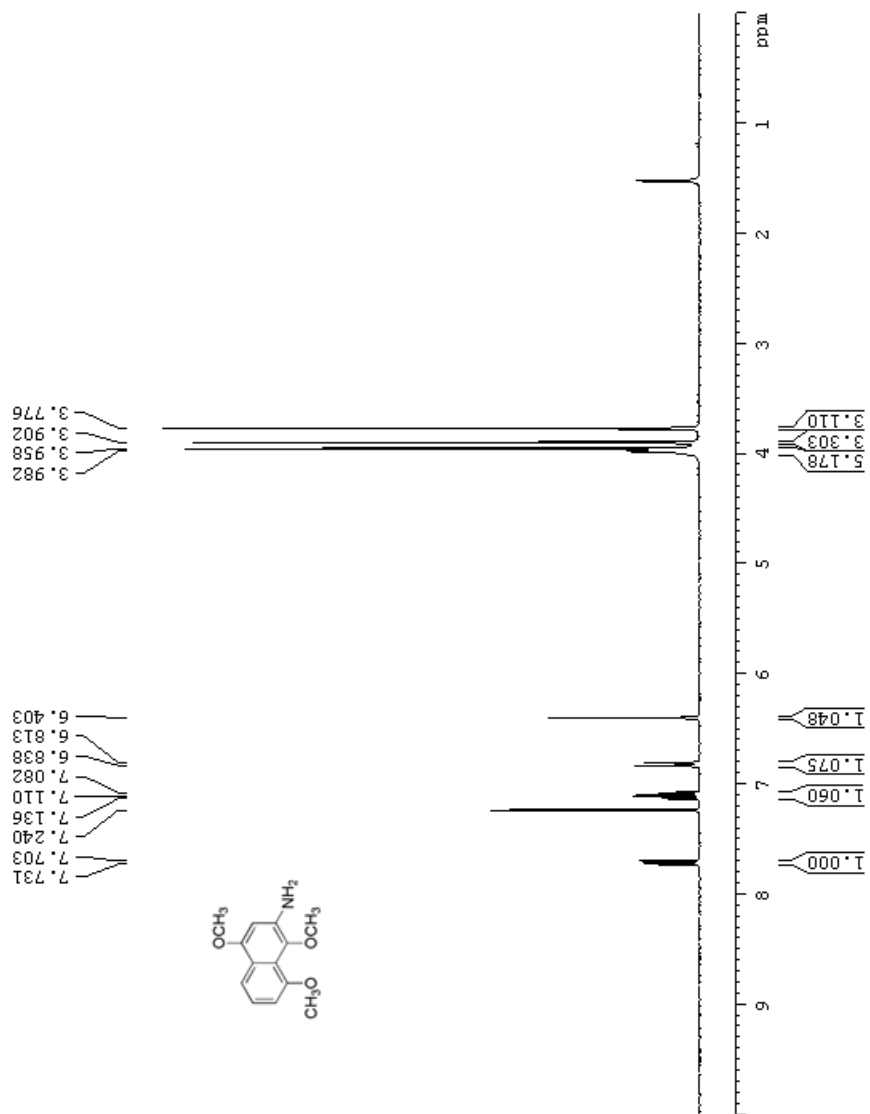

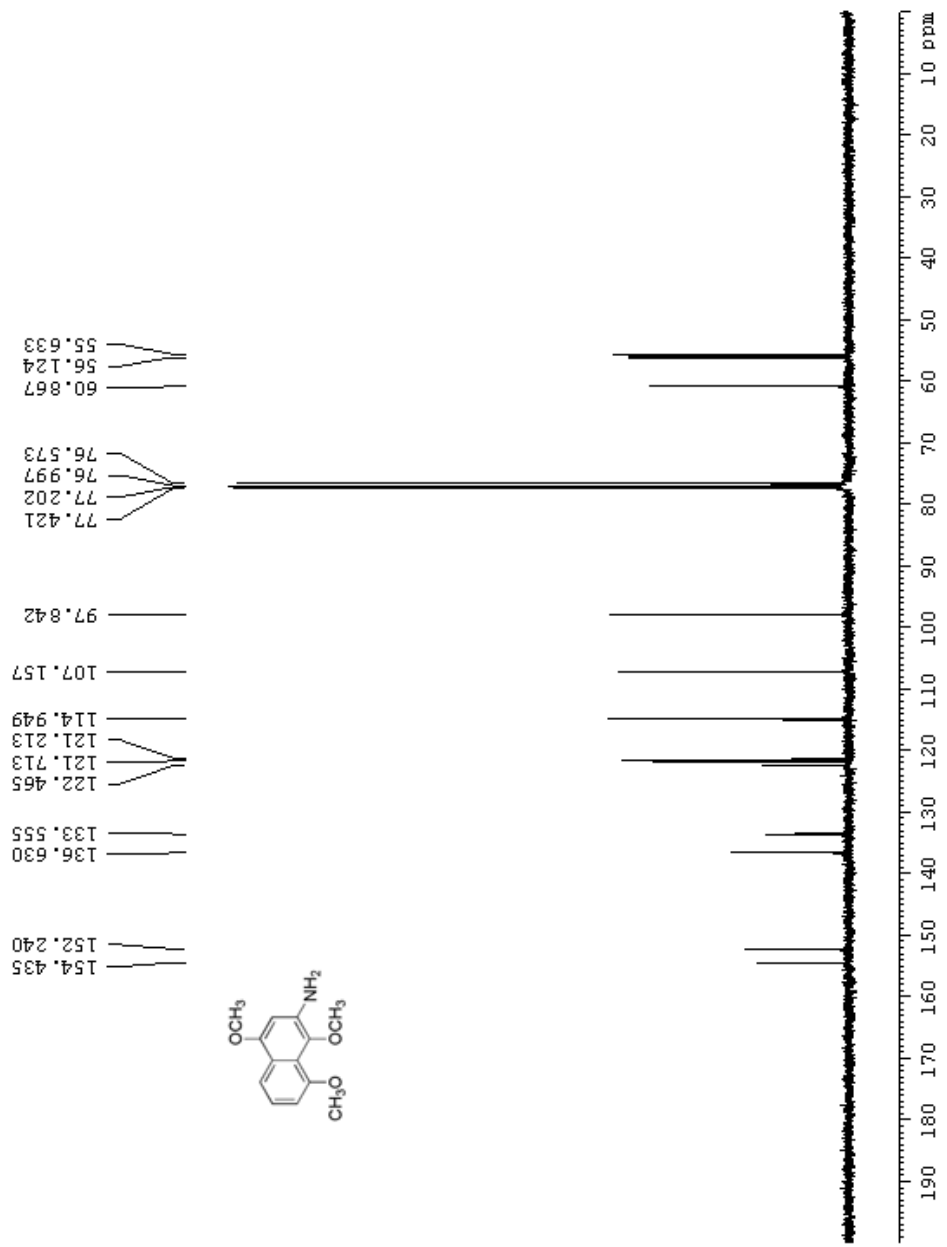

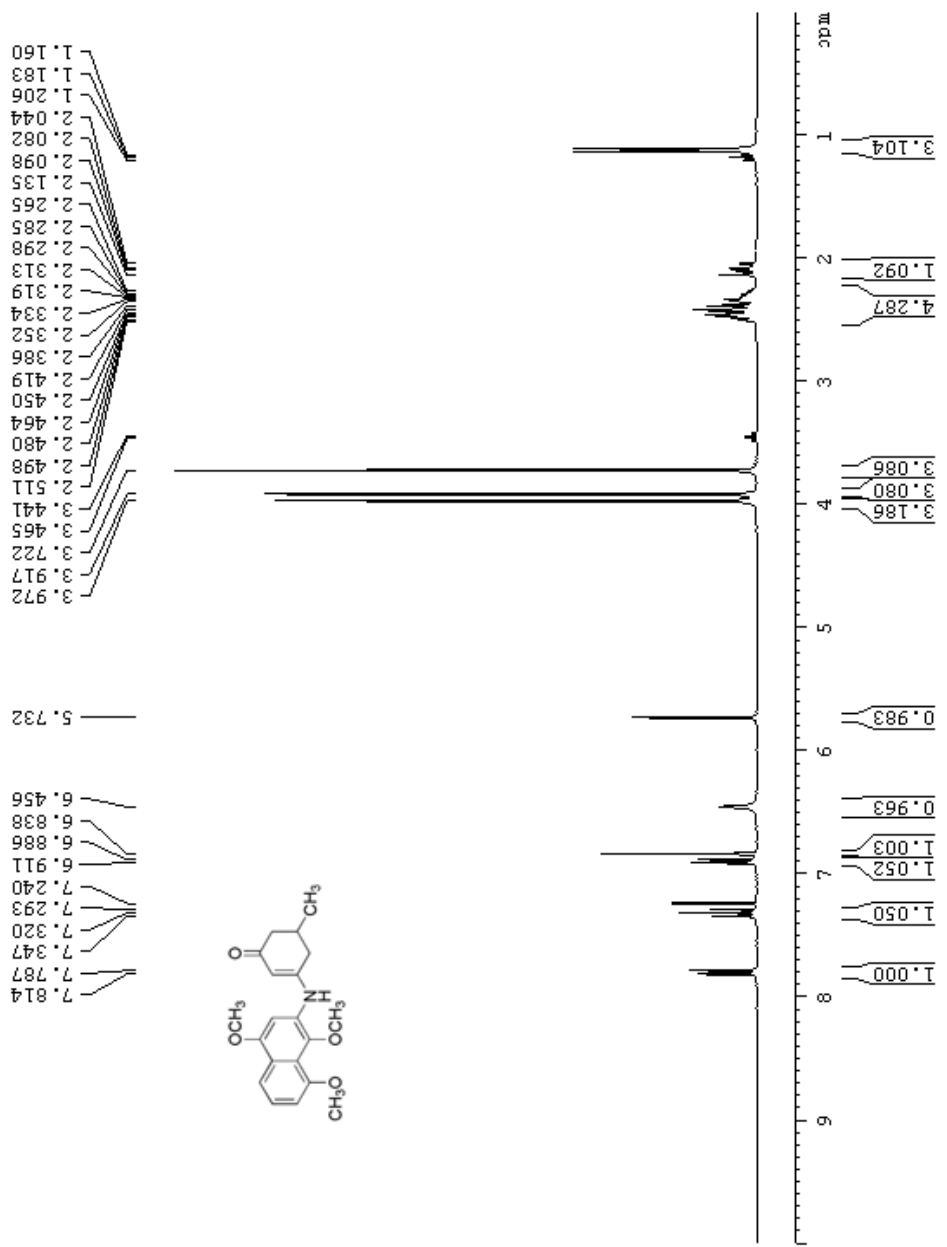

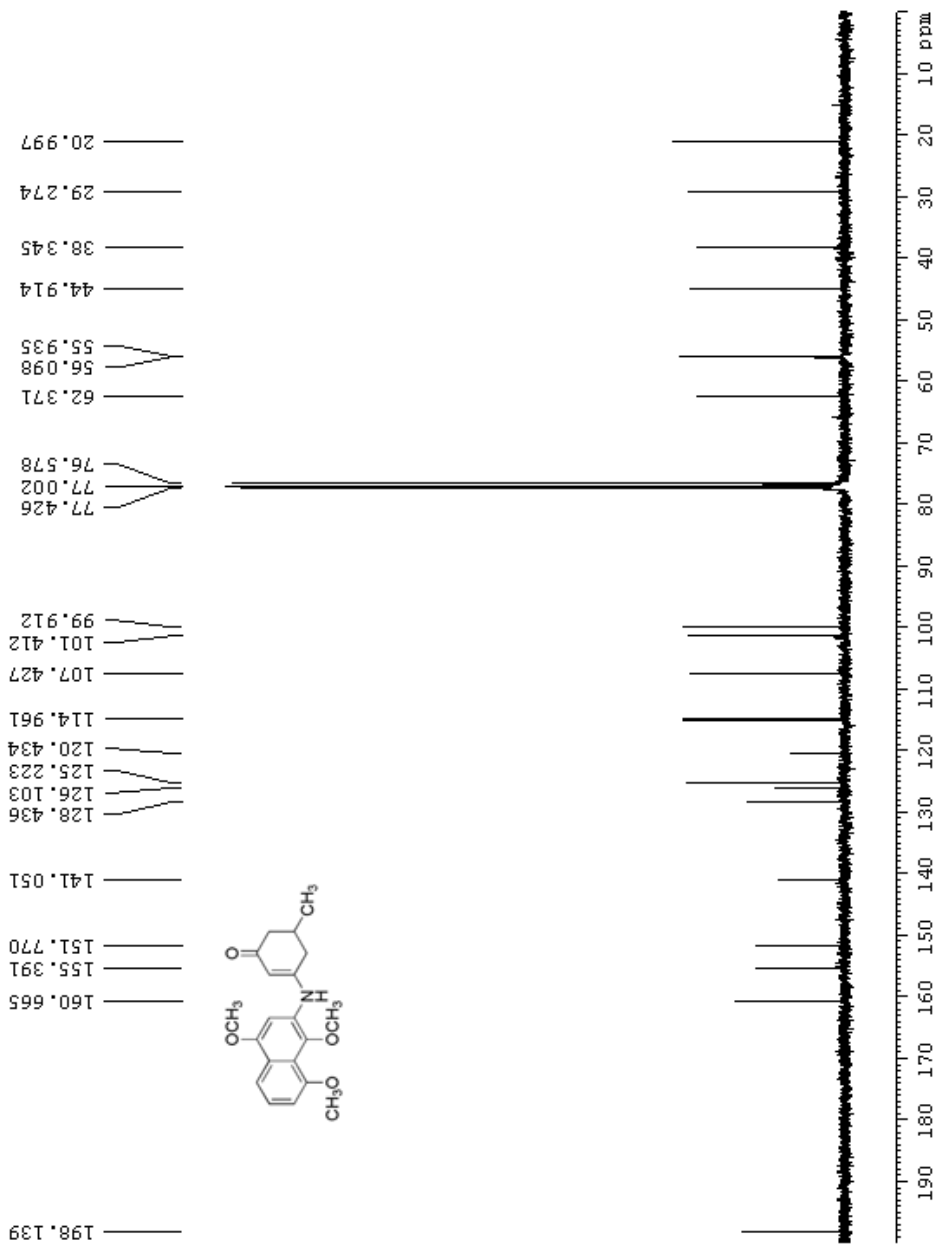

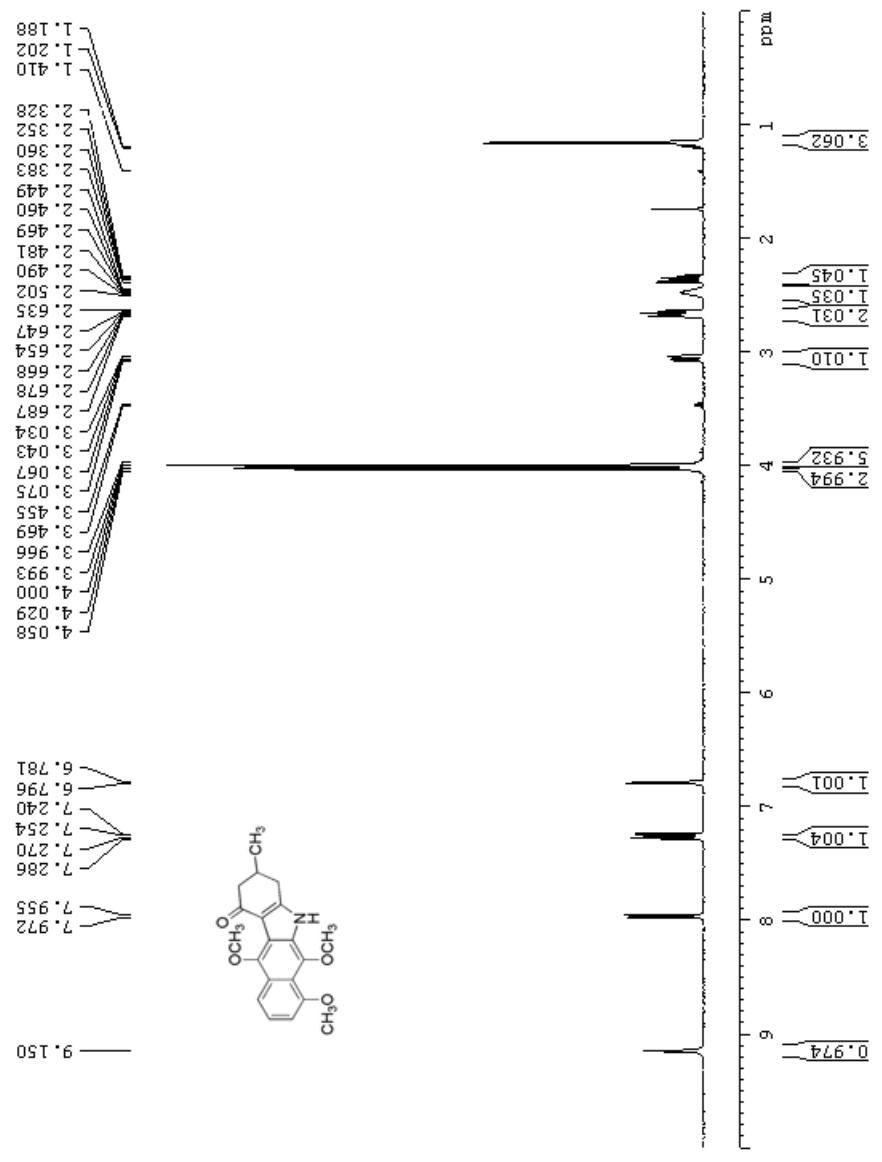

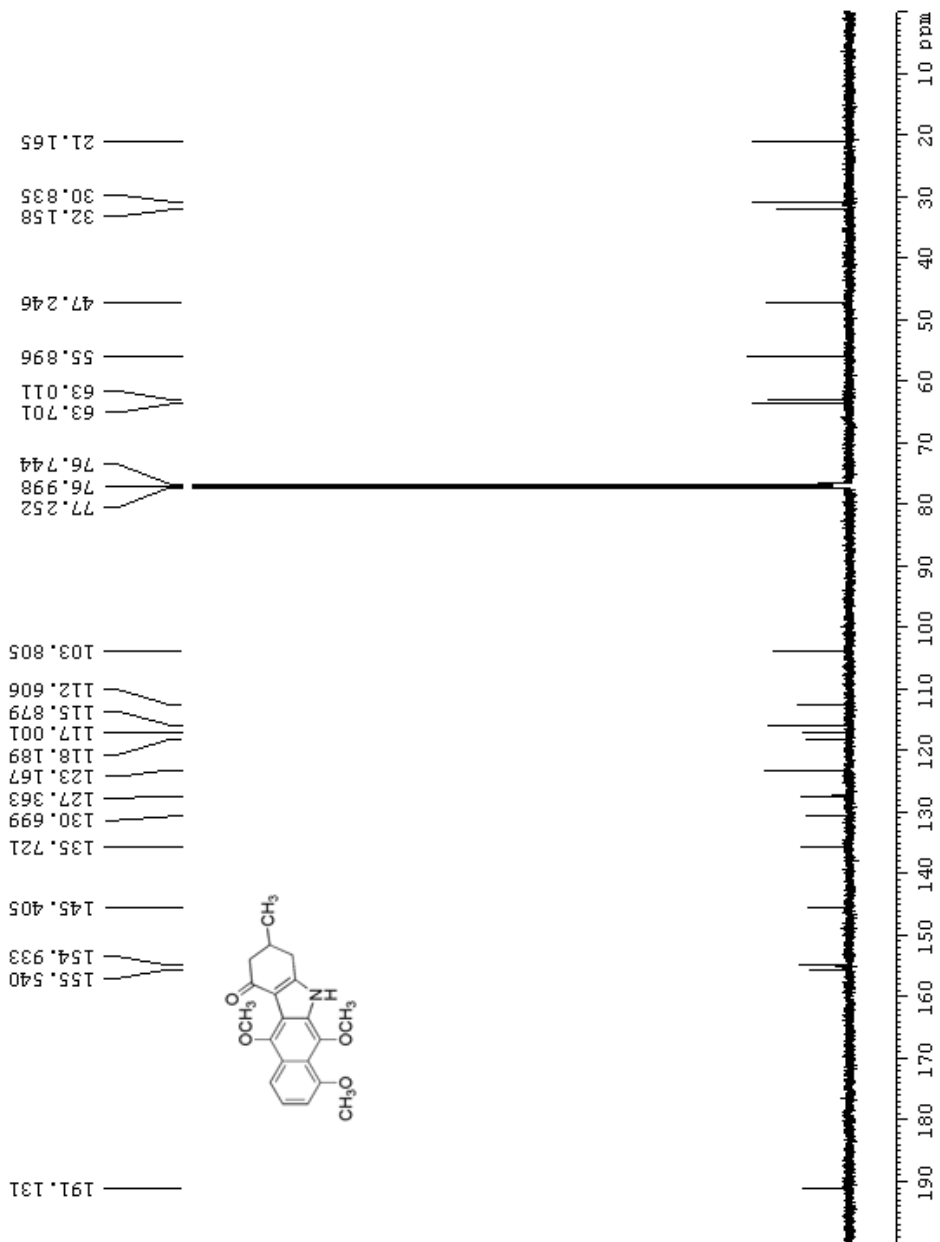

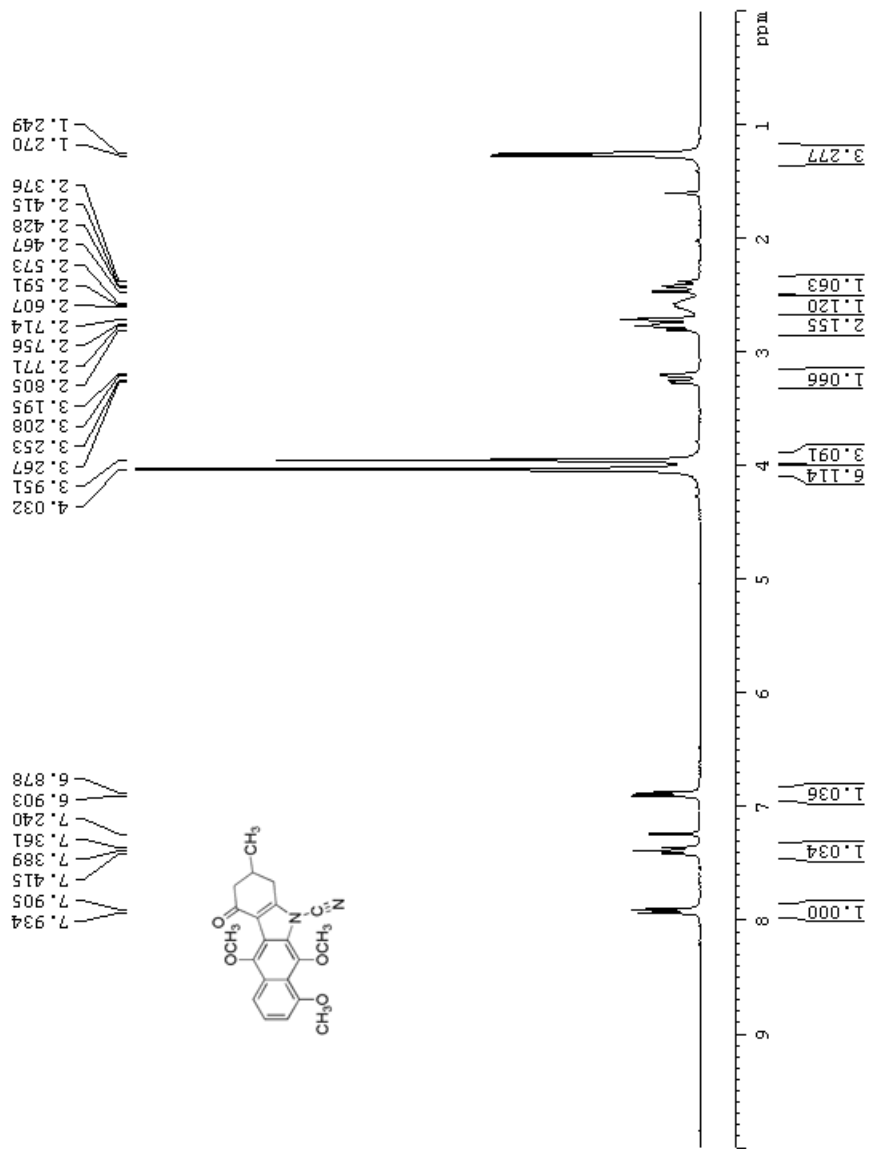

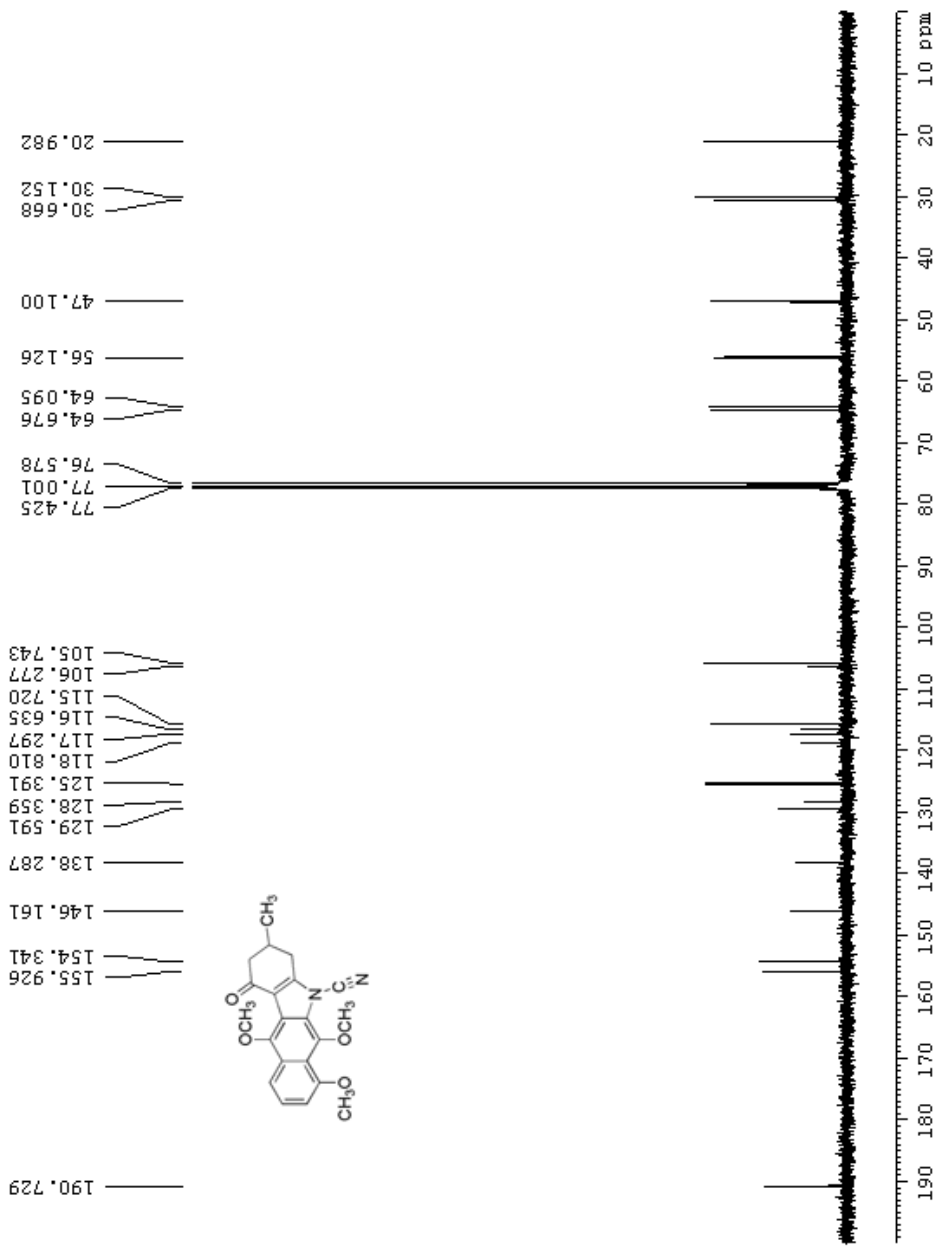



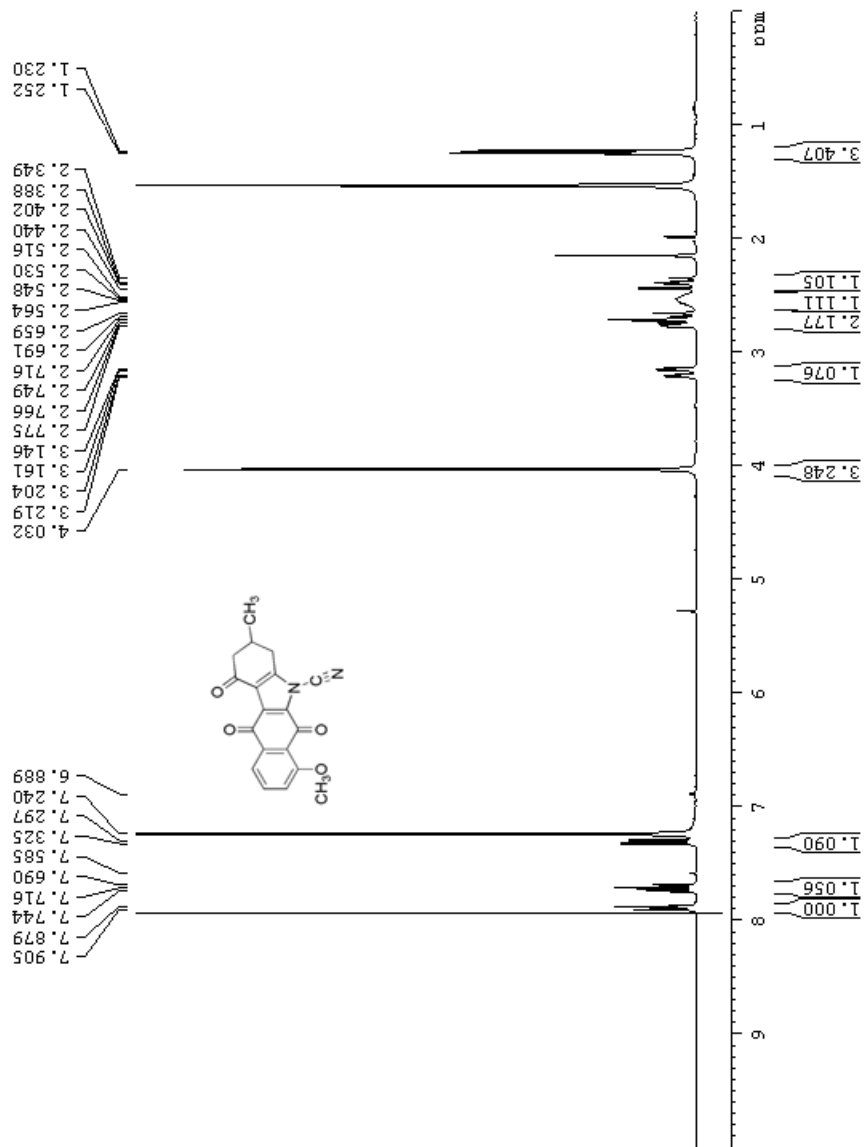

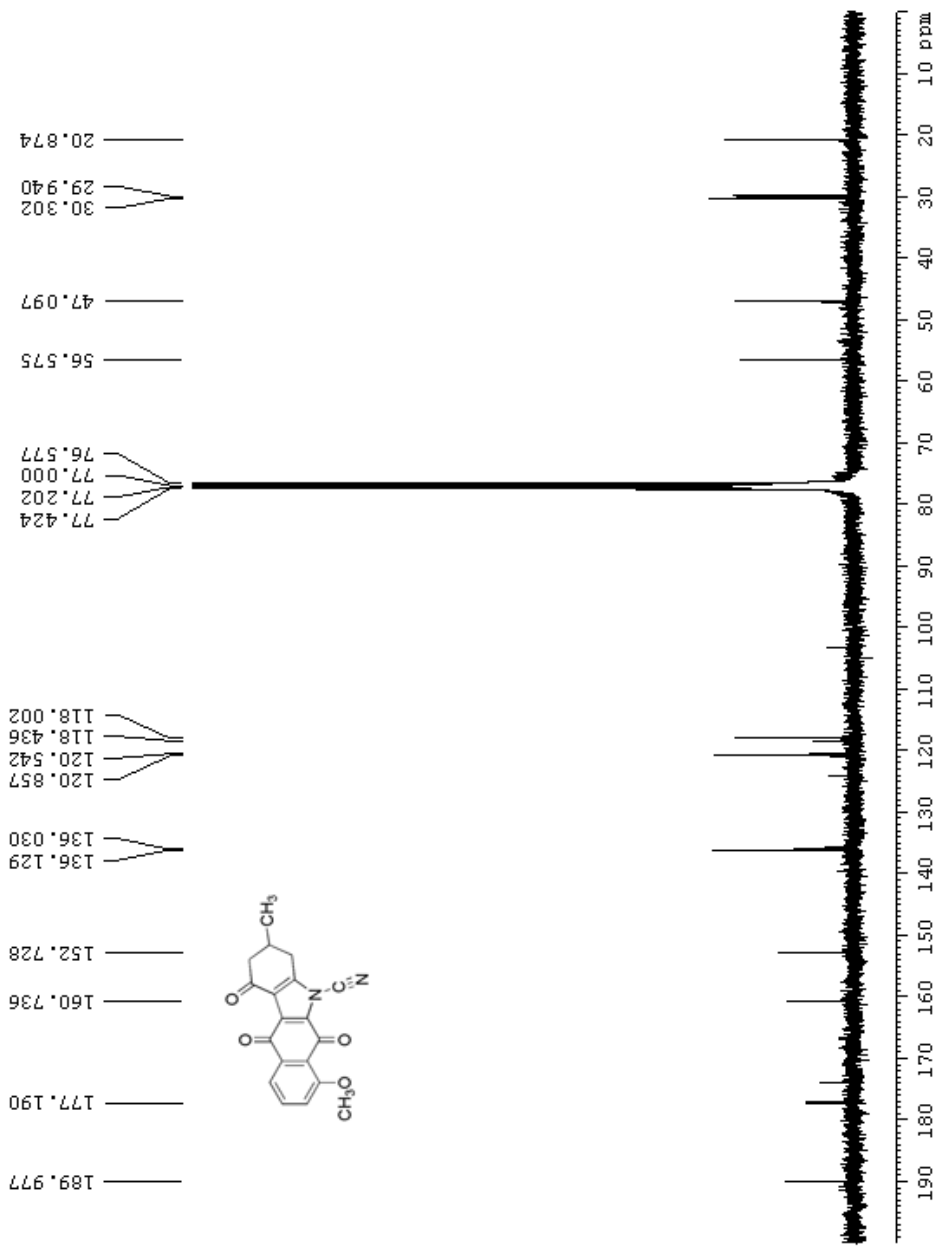

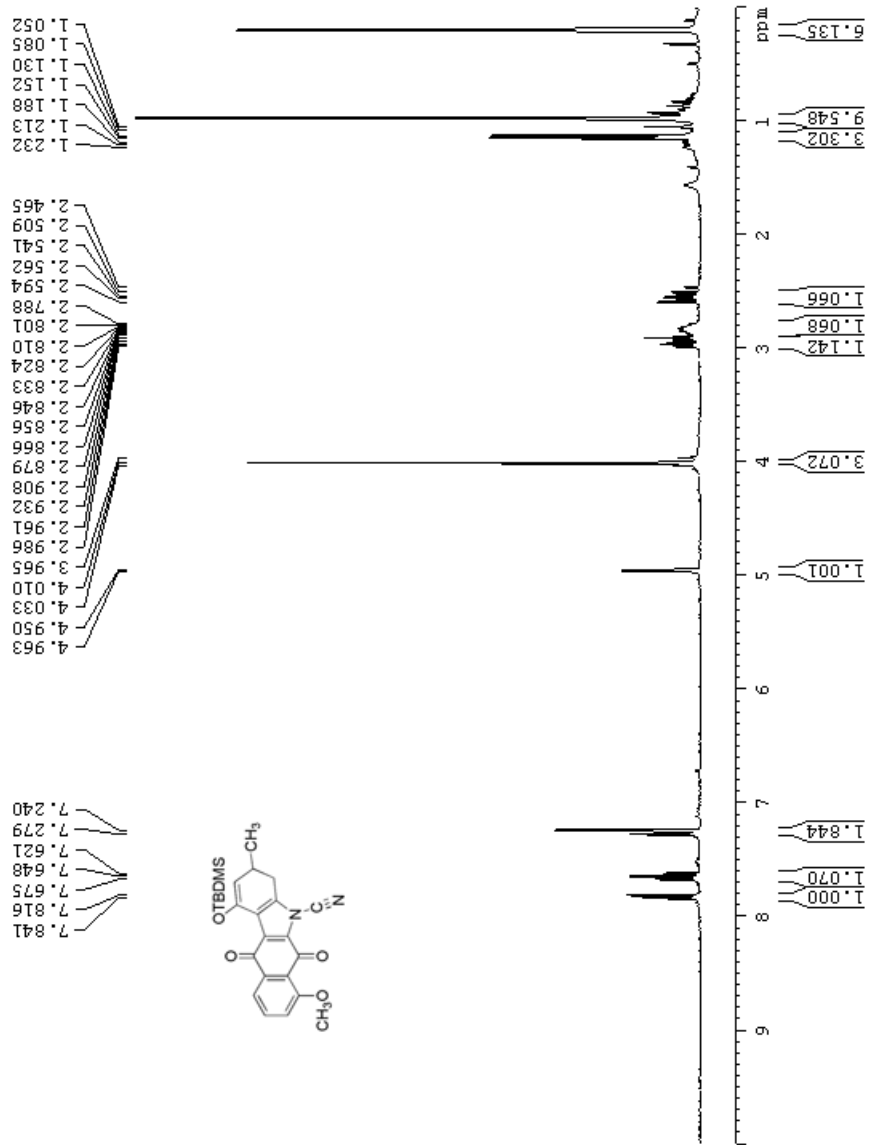



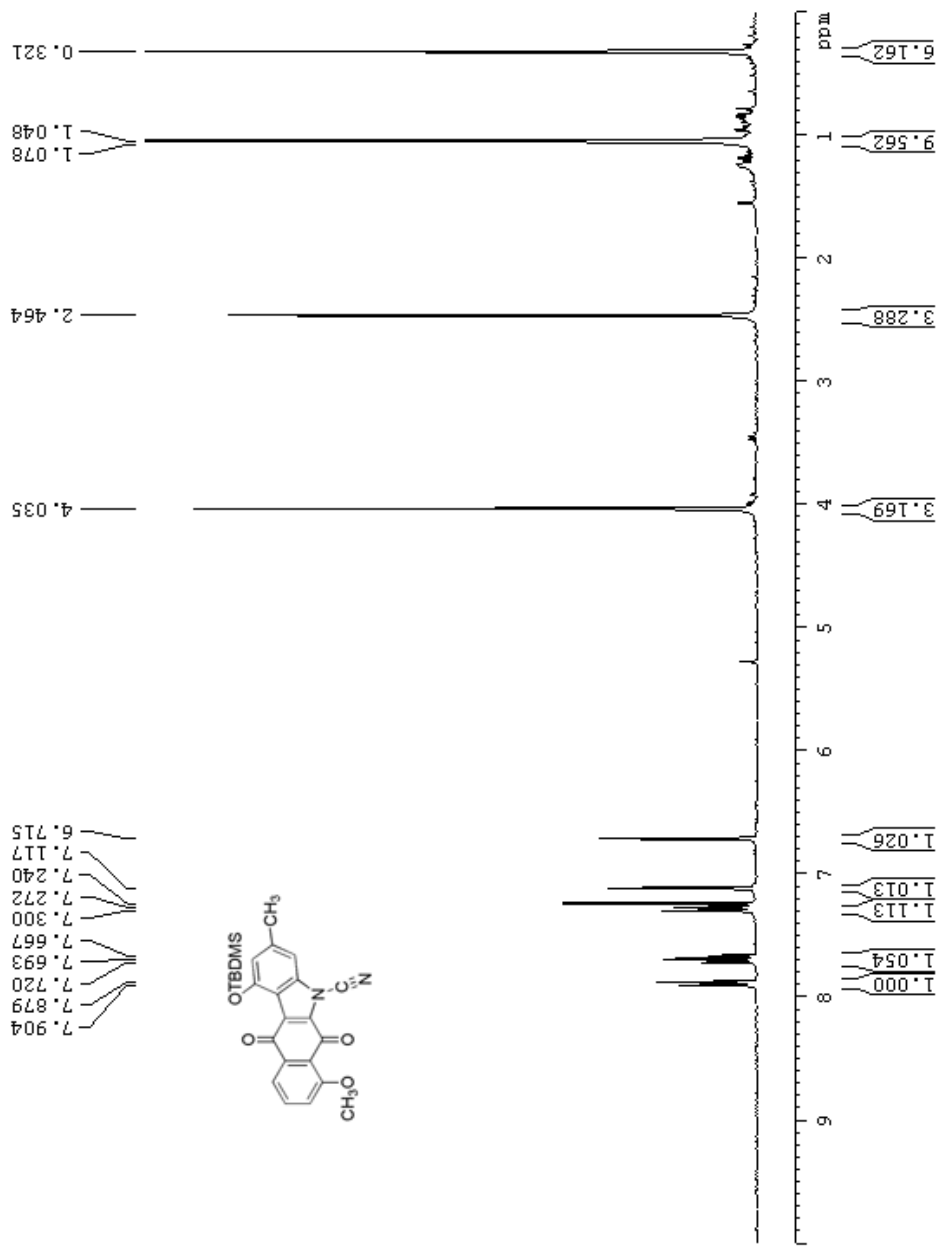

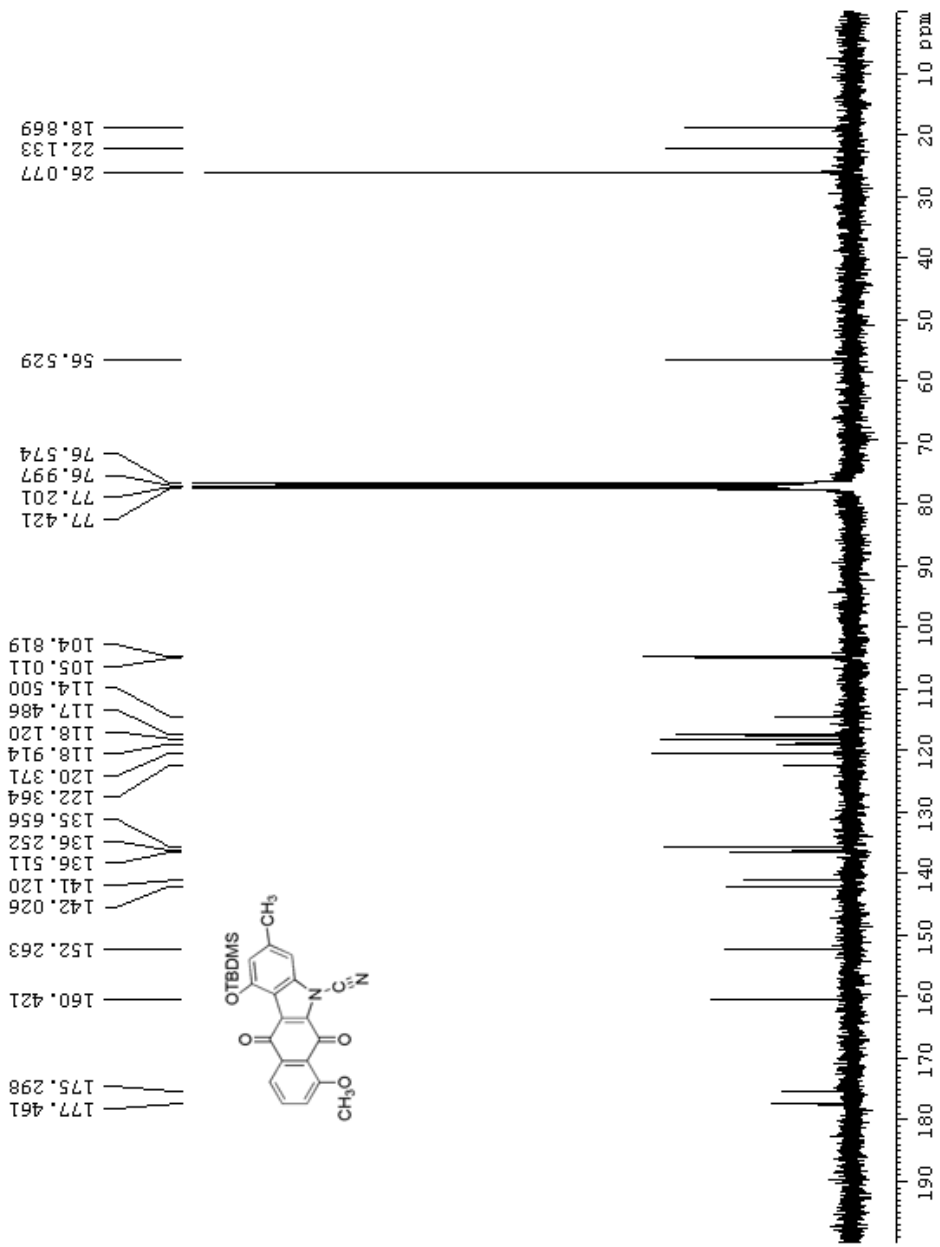

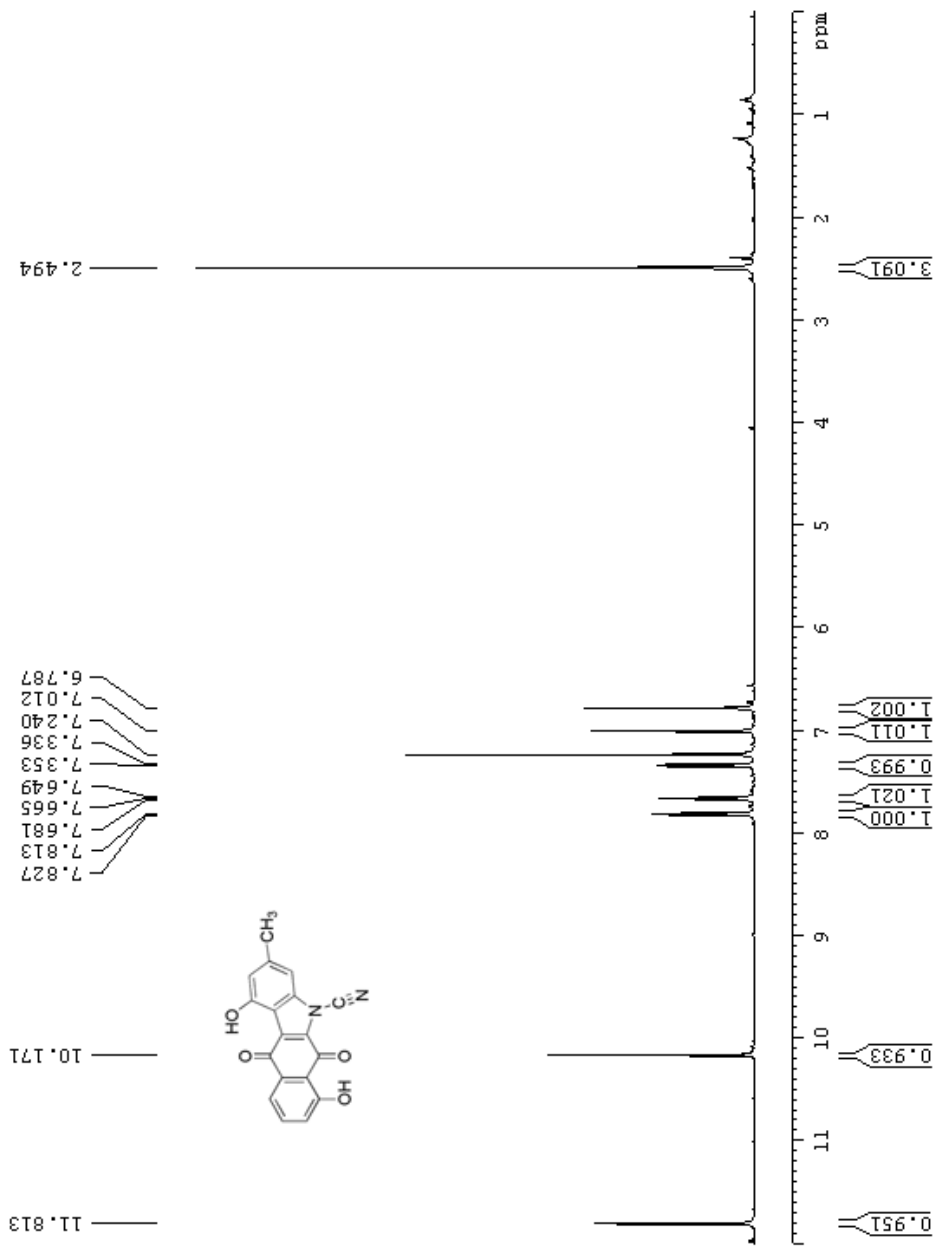

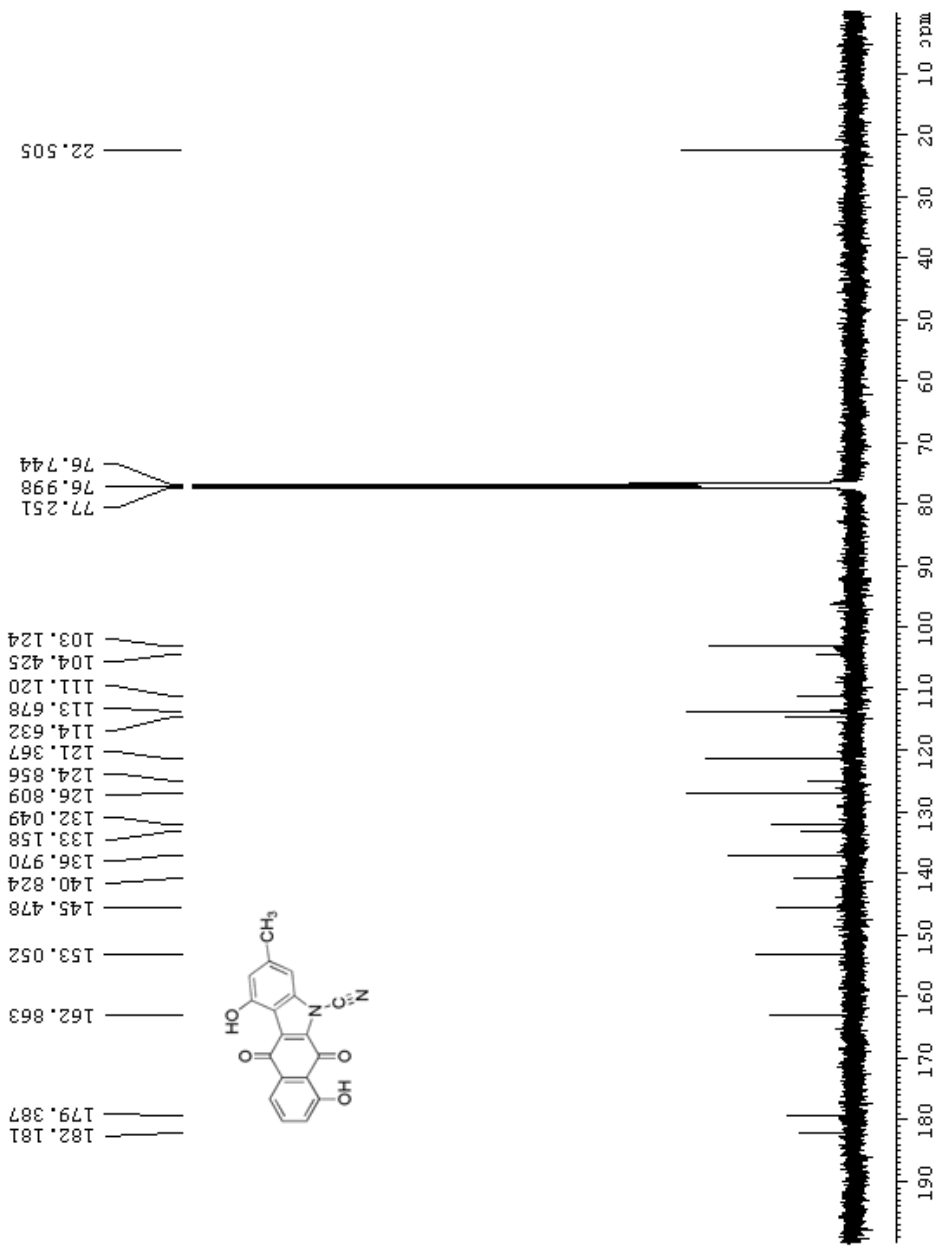



## 6. References

1. C. T. Lee, W. T. Yang and R. G. Parr, *Phys. Rev. B*, 1988, **37**, 785-789.
2. A. D. Becke, *J. Chem. Phys.*, 1993, **98**, 5648-5652.
3. P. v. R. Schleyer, ed., *Encyclopedia of Computational Chemistry*, John Wiley, New York, 1998.
4. *Gaussian 03, Revision C.02*, M. J. T. Frisch, G. W.; Schlegel, H. B.; Scuseria, G. E.; Robb, M. A.; Cheeseman, J. R.; Montgomery, Jr., J. A.; Vreven, T.; Kudin, K. N.; Burant, J. C.; Millam, J. M.; Iyengar, S. S.; Tomasi, J.; Barone, V.; Mennucci, B.; Cossi, M.; Scalmani, G.; Rega, N.; Petersson, G. A.; Nakatsuji, H.; Hada, M.; Ehara, M.; Toyota, K.; Fukuda, R.; Hasegawa, J.; Ishida, M.; Nakajima, T.; Honda, Y.; Kitao, O.; Nakai, H.; Klene, M.; Li, X.; Knox, J. E.; Hratchian, H. P.; Cross, J. B.; Bakken, V.; Adamo, C.; Jaramillo, J.; Gomperts, R.; Stratmann, R. E.; Yazyev, O.; Austin, A. J.; Cammi, R.; Pomelli, C.; Ochterski, J. W.; Ayala, P. Y.; Morokuma, K.; Voth, G. A.; Salvador, P.; Dannenberg, J. J.; Zakrzewski, V. G.; Dapprich, S.; Daniels, A. D.; Strain, M. C.; Farkas, O.; Malick, D. K.; Rabuck, A. D.; Raghavachari, K.; Foresman, J. B.; Ortiz, J. V.; Cui, Q.; Baboul, A. G.; Clifford, S.; Cioslowski, J.; Stefanov, B. B.; Liu, G.; Liashenko, A.; Piskorz, P.; Komaromi, I.; Martin, R. L.; Fox, D. J.; Keith, T.; Al-Laham, M. A.; Peng, C. Y.; Nanayakkara, A.; Challacombe, M.; Gill, P. M. W.; Johnson, B.; Chen, W.; Wong, M. W.; Gonzalez, C.; and Pople, J. A.; Gaussian, Inc., Wallingford CT, 2004.
5. B. B. Hasinoff, A. M. Creighton, H. Kozłowska, P. Thampatty, W. P. Allan and J. C. Yalowich, *Mol. Pharmacol.*, 1997, **52**, 839-845.
6. W. L. F. Armarego and D. D. Perrin, *Purification of laboratory chemicals*, Butterworth-Heinemann; Elsevier Science, Oxford, Boston, 1996, p. 1-529.
7. W. C. Still, M. Kahn and A. Mitra, *J. Org. Chem.*, 1978, **43**, 2923-2925.
8. T. W. Greene and P. G. M. Wuts, *Protective Groups in Organic Synthesis*, Wiley, New York, 1999, p. 23.
9. O. Cakmak, I. Demirtas and H. T. Balaydin, *Tetrahedron*, 2002, **58**, 5603-5609.
10. R. L. Hannan, R. B. Barber and H. Rapoport, *J. Org. Chem.*, 1979, **44**, 2153-2158.
11. Y. Tanoue, A. Terada and Y. Matsumoto, *Bull. Chem. Soc. Jpn.*, 1989, **62**, 2736-2738.
12. W. Williams, X. Sun and D. Jebaratnam, *J. Org. Chem.*, 1997, **62**, 4364-4369.
13. J. P. Wolfe, J. Ahman, J. P. Sadighi, R. A. Singer and S. L. Buchwald, *Tetrahedron Lett.*, 1997, **38**, 6367-6370.
14. G. Malesani and M. G. Ferlin, *J. Heterocycl. Chem.*, 1987, **24**, 513-517.
15. B. Akermark, L. Ebersson, E. Jonsson and E. Pettersson, *J. Org. Chem.*, 1975, **40**, 1365-1367.
16. R. E. Murray and G. Zweifel, *Synthesis*, 1980, 150-151.
17. L. N. Mander and S. P. Sethi, *Tetrahedron Lett.*, 1984, **25**, 5953-5956.
